# Supplementary material for: 1H-Benzimidazole-5-carboxamidine derivatives: design, synthesis, molecular docking, DFT and antimicrobial studies
Source: Royal Society of Chemistry journal article supplement (doi:10.1039/d0nj01899f), 2020-01-01
Supplement: d0nj01899f1.pdf [file d0nj01899f1.pdf]

## 1*H*-Benzimidazole-5-Carboxamidines Derivatives: Design, Synthesis, Molecular Docking, DFT and Antimicrobial Studies

Meryem Erol,<sup>\*a</sup> Ismail Celik,<sup>a,b</sup> Ozlem Temiz-Arpaci,<sup>b</sup> Hakan Göker,<sup>b</sup> Fatma Kaynak-Onurdag,<sup>c</sup> and Suzan Okten<sup>c</sup>

<sup>a</sup>Erciyes University, Faculty of Pharmacy, Department of Pharmaceutical Chemistry, Kayseri, Turkey

<sup>b</sup>Ankara University, Faculty of Pharmacy, Department of Pharmaceutical Chemistry, Ankara, Turkey

<sup>c</sup>Trakya University, Faculty of Pharmacy, Department of Pharmaceutical Microbiology, Edirne, Turkey

## SUPPORTING INFORMATION

### Table of Content:

| No. | Contents                                                                              | Page no. |
|-----|---------------------------------------------------------------------------------------|----------|
| 1   | <b>Table S1.</b> List of synthesized compounds                                        | 2        |
| 2   | <b>Table S2.</b> Calculated electronic properties ( <b>M1-M15</b> )                   | 3        |
| 3   | <b>Table S3.</b> Calculated ADME parameters ( <b>M1-M15</b> )                         | 4        |
| 4   | Spectroscopic data of <b>M1-M15</b>                                                   | 5-12     |
| 5   | Physical Data: MASS, <sup>1</sup> H-NMR, <sup>13</sup> C-NMR spectra of <b>M1-M15</b> | 13-34    |
| 6   | Protein-ligand interaction diagram of <b>M7</b> and ampicillin                        | 35       |

**Table S1.** List of synthesized compounds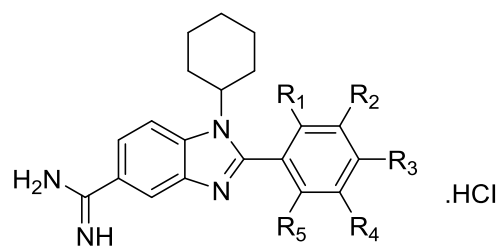

| Compound | R <sub>1</sub>    | R <sub>2</sub> | R <sub>3</sub>                | R <sub>4</sub> | R <sub>5</sub> |
|----------|-------------------|----------------|-------------------------------|----------------|----------------|
| M1       | -H                | -H             | -CH <sub>3</sub>              | -H             | -H             |
| M2       | -H                | -H             | C <sub>2</sub> H <sub>5</sub> | -H             | -H             |
| M3       | -H                | -H             | -OCH <sub>3</sub>             | -H             | -H             |
| M4       | -H                | -H             | -Br                           | -H             | -H             |
| M5       | -H                | -H             | -Cl                           | -H             | -H             |
| M6       | -H                | -H             |                               | -H             | -H             |
| M7       | -H                | -H             |                               | -H             | -H             |
| M8       | -H                | -H             |                               | -H             | -H             |
| M9       | -H                | -H             | -COOH                         | -H             | -H             |
| M10      | -H                | -COOH          | -H                            | -H             | -H             |
| M11      | -CH <sub>3</sub>  | -H             | -H                            | -H             | -H             |
| M12      |                   | -H             | -H                            | -H             | -H             |
| M13      | -OCH <sub>3</sub> | -H             | -H                            | -H             | -H             |
| M14      | -F                | -H             | -H                            | -H             | -H             |
| M15      | -H                | -F             | -H                            | -H             | -H             |

**Table S2.** Calculated electronic properties (M1-M15)

| Compound | IP<br>(-HOMO) | EA<br>(-LUMO) | $\chi$<br>$(IP+EA)/2$ | $\eta$<br>$(IP-EA)/2$ | S<br>$(1/2\eta)$ | $\mu$<br>$-(IP+EA)/2$ | $\omega$<br>$(\mu^2/2\eta)$ |
|----------|---------------|---------------|-----------------------|-----------------------|------------------|-----------------------|-----------------------------|
| M1       | 0.2091        | 0.04849       | 0.128795              | 0.080305              | 6.226262         | -0.1288               | 0.103282                    |
| M2       | 0.20827       | 0.04766       | 0.127965              | 0.080305              | 6.226262         | -0.12797              | 0.101955                    |
| M3       | 0.20508       | 0.0426        | 0.12384               | 0.08124               | 6.154604         | -0.12384              | 0.094389                    |
| M4       | 0.21955       | 0.05577       | 0.13766               | 0.08189               | 6.105752         | -0.13766              | 0.115706                    |
| M5       | 0.21066       | 0.05722       | 0.13394               | 0.07672               | 6.517205         | -0.13394              | 0.116918                    |
| M6       | 0.18287       | 0.02934       | 0.106105              | 0.076765              | 6.513385         | -0.10611              | 0.073329                    |
| M7       | 0.21133       | 0.0362        | 0.123765              | 0.087565              | 5.710044         | -0.12377              | 0.087465                    |
| M8       | 0.20563       | 0.06337       | 0.1345                | 0.07113               | 7.029383         | -0.1345               | 0.127163                    |
| M9       | 0.2133        | 0.07899       | 0.146145              | 0.067155              | 7.445462         | -0.14615              | 0.159023                    |
| M10      | 0.21256       | 0.0687        | 0.14063               | 0.07193               | 6.951203         | -0.14063              | 0.137473                    |
| M11      | 0.20803       | 0.04758       | 0.127805              | 0.080225              | 6.232471         | -0.12781              | 0.101802                    |
| M12      | 0.19774       | 0.04087       | 0.119305              | 0.078435              | 6.374705         | -0.11931              | 0.090736                    |
| M13      | 0.2022        | 0.04392       | 0.12306               | 0.07914               | 6.317918         | -0.12306              | 0.095677                    |
| M14      | 0.20696       | 0.05216       | 0.12956               | 0.0774                | 6.459948         | -0.12956              | 0.108435                    |
| M15      | 0.21853       | 0.05794       | 0.138235              | 0.080295              | 6.227038         | -0.13824              | 0.118992                    |

**Table S3.** Calculated ADME parameters (M1-M15)

| Comp. | MW      | Donor HB | Accept HB | QPlogPo/w | QPlogS | % HumanOralAbsorption | PSA     | Rule Of Five | Rule Of Three |
|-------|---------|----------|-----------|-----------|--------|-----------------------|---------|--------------|---------------|
| M1    | 332.447 | 3.000    | 3.000     | 4.017     | -5.839 | 100.000               | 63.566  | 0            | 1             |
| M2    | 346.474 | 3.000    | 3.000     | 4.360     | -6.202 | 100.000               | 63.538  | 0            | 1             |
| M3    | 348.447 | 3.000    | 3.750     | 3.836     | -5.566 | 100.000               | 71.867  | 0            | 0             |
| M4    | 397.317 | 3.000    | 3.000     | 4.288     | -6.149 | 100.000               | 63.591  | 0            | 1             |
| M5    | 397.317 | 3.000    | 3.000     | 4.288     | -6.149 | 100.000               | 63.591  | 0            | 1             |
| M6    | 352.866 | 3.000    | 3.000     | 4.213     | -6.036 | 100.000               | 63.591  | 0            | 1             |
| M7    | 361.489 | 3.000    | 4.000     | 4.178     | -6.220 | 100.000               | 67.002  | 0            | 1             |
| M8    | 424.544 | 3.000    | 3.750     | 5.668     | -7.730 | 96.800                | 71.169  | 1            | 1             |
| M9    | 394.518 | 3.000    | 3.000     | 5.319     | -7.259 | 94.828                | 63.494  | 1            | 1             |
| M10   | 362.430 | 4.000    | 5.000     | 2.986     | -5.166 | 65.270                | 113.935 | 0            | 1             |
| M11   | 362.430 | 4.000    | 5.000     | 3.031     | -5.013 | 67.140                | 113.834 | 0            | 1             |
| M12   | 332.447 | 3.000    | 3.000     | 3.968     | -5.536 | 100.000               | 63.521  | 0            | 0             |
| M13   | 424.544 | 3.000    | 3.750     | 5.810     | -7.561 | 100.000               | 68.675  | 1            | 1             |
| M14   | 348.447 | 3.000    | 3.750     | 3.831     | -5.366 | 100.000               | 70.359  | 0            | 0             |
| M15   | 336.411 | 3.000    | 3.000     | 3.897     | -5.478 | 100.000               | 63.730  | 0            | 0             |

DonorHB: Estimated number of hydrogen bonds that would be donated by the solute to water molecules in an aqueous solution (recommended value:0-6); Acceptor HB: Estimated number of hydrogen bonds that would be accepted by the solute from water molecules in an aqueous solution (recommended value:2-20); QPlogPo/w: Predicted octanol/water partition coefficient (recommended value:-2-6.5); PSA: Van der Waals surface area of polar nitrogen and oxygen atoms and carbonyl carbon atoms (recommended value:7-200); Rule of Five: Number of violations of Lipinski's rule of five [41]. The rules are: mol MW < 500, QPlogPo/w < 5, donorHB ≤ 5, accptHB ≤ 10. Compounds that satisfy these rules are considered druglike. (The "five" refers to the limits, RuleOfThree Number of violations of Jorgensen's rule of three. The three rules are: , QPlogS > -5.7, QP PCaco > 22 nm/s, # Primary Metabolites < 7.

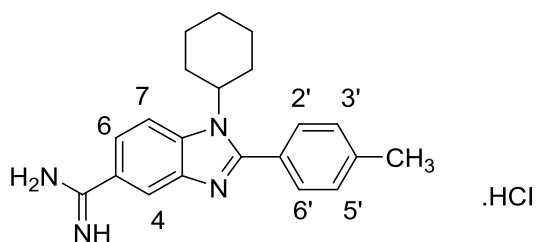

**1-cyclohexyl-2-(4-methylphenyl)-1H-benzimidazole-5-carboxamide HCl (M1):**

Yield 35%, Mp: 264-266°C. <sup>1</sup>H-NMR δ ppm (DMSO-d<sub>6</sub>): 1.20-1.61 (m, 4H, cyclohexyl -CH<sub>2</sub>), 1.80-1.89 (m, 4H, cyclohexyl -2CH<sub>2</sub>), 2.21-2.30 (m, 2H, cyclohexyl -CH<sub>2</sub>), 2.40 (s, 3H, -CH<sub>3</sub>), 4.24-4.30 (m, H, cyclohexyl -CH), 7.39 (d, 2H, J<sub>o</sub>=7.6 Hz, H-3',5'), 7.53 (d, 2H, J<sub>o</sub>= 8.4 Hz, H-2',6'), 7.68 (dd, H, J<sub>o</sub>= 8.4 Hz, J<sub>m</sub>= 2 Hz, H-6), 8.01 (d, H, J<sub>o</sub>=8.4 Hz, H-7), 8.19 (d, H, J<sub>m</sub>=1.6 Hz, H-4). <sup>13</sup>C-NMR δ ppm (DMSO-d<sub>6</sub>): 20,91, 24,89, 25,43, 30,38, 56,80, 113.27, 119.24, 121.00, 122.68, 127.14, 129.32, 136.66, 139.79, 142.76, 155.49, 166.04, 176.58. MS (ESI+) *m/z*: 333.4 (M+H, 80%), 251.3 (100%). Anal. Calcd for C<sub>21</sub>H<sub>24</sub>N<sub>4</sub>.1,5 HCl . 0,5 C<sub>2</sub>H<sub>6</sub>O; C: 65.89, H: 7.10, N:13.97 Found; C: 65.55, H:7.23, N: 14.01.

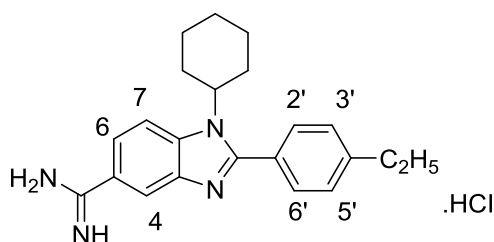

**1-cyclohexyl-2-(4-ethylphenyl)-1H-benzimidazole-5-carboxamide HCl (M2):**

Yield 40%, Mp: 300°C. <sup>1</sup>H-NMR δ ppm (DMSO-d<sub>6</sub>): 1.24-1.38 (t, 3H, -CH<sub>2</sub>-CH<sub>3</sub>), 1.39-1.64 (m, 4H, -2CH<sub>2</sub>), 1.85 (d, 2H, -CH<sub>2</sub>), 1.94 (d, 2H, -CH<sub>2</sub>), 2.26-2.34 (m, 2H, -CH<sub>2</sub>), 2.71-2.77 (q, 2H, -CH<sub>2</sub>-CH<sub>3</sub>), 4.31- 4.37 (m, H, -CH), 7.47 (d, 2H, J<sub>o</sub>=8.0 Hz, H-3',5'), 7.63 (d, 2H, J<sub>o</sub>=8.0 Hz, H-2',6'), 7.79 (dd, H, J<sub>o</sub>= 8.8 Hz, J<sub>m</sub>= 1.6 Hz, H-6), 8.17 (d, H, J<sub>o</sub>= 8.8 Hz, H-7), 8.30 (d, H, J<sub>m</sub>=1.6 Hz, H-4), 9.26 (s, 2H), 9.48 (s, 2H). <sup>13</sup>C-NMR δ ppm (DMSO-d<sub>6</sub>) : 15.20, 24.16, 25.45, 28.01, 30.35, 57.18, 113.81, 119.46, 121.43, 121.93, 126.47, 128.29, 129.48, 136.86, 141.39, 146.46, 155.48, 165.71. MS (ESI+) *m/z*: 347.5 (M+H, 90%), 265.4 (100%). Anal. Calcd for C<sub>22</sub>H<sub>26</sub>N<sub>4</sub>.1,25 HCl.0,5 C<sub>2</sub>H<sub>6</sub>O.0,75 H<sub>2</sub>O C:68.22, H:7.45, N: 14.14 Found; C: 68.50, H: 7.51, N:14.40.

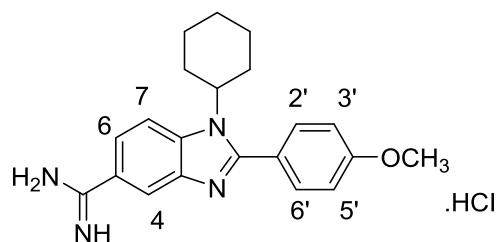

**1-cyclohexyl-2-(4-methoxyphenyl)-1H-benzimidazole-5-carboxamide HCl (M3):**

Yield 70%, M.p. 118-120°C.  $^1\text{H-NMR}$   $\delta$  ppm (DMSO- $d_6$ ): 1.22-1.63 (m, 4H, -2CH<sub>2</sub>), 1.81-1.89 (t, 4H, -2CH<sub>2</sub>), 2.22-2.31 (m, 2H, -CH<sub>2</sub>), 3.84 (s, 3H, -OCH<sub>3</sub>), 4.23-4.26 (t, H, -CH), 7.12 (d, 2H,  $J_o=8.8$  Hz, H-3',5'), 7.58 (d, 2H,  $J_o=8.8$  Hz, H-2'-6'), 7.68 (d, H,  $J_o=8.4$  Hz, H-6), 7.87 (d, H,  $J_o=8.4$  Hz, H-7), 8.09 (d, H,  $J_m=1.2$  Hz, H-4)  $^{13}\text{C-NMR}$   $\delta$  ppm (DMSO- $d_6$ ): 24.82, 25.45, 32.95, 57.09, 62.25, 113.69, 120.21, 121.15, 121.81, 123.92, 129.17, 131.49, 131.91, 137.26, 142.69, 154.69, 165.78. MS (ESI+)  $m/z$ : 349.37 (M+H, 50%), 267.27 (100%). Anal. Calcd for C<sub>21</sub>H<sub>24</sub>N<sub>4</sub>O<sub>1.25</sub> HCl . 0,25 C<sub>2</sub>H<sub>6</sub>O. 3 H<sub>2</sub>O; C:56.19, H:7.18, N:12.19, Found; C: 56.35, H: 7.01, N:12.50.

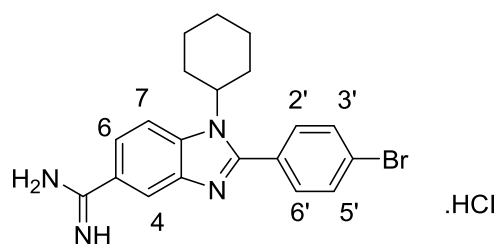

**1-cyclohexyl-2-(4-bromophenyl)-1H-benzimidazole-5-carboxamide HCl (M4):**

Yield 48%, M.p. 344-347°C.  $^1\text{H-NMR}$   $\delta$  ppm (DMSO- $d_6$ ): 1.23-1.63 (m, 4H, -2CH<sub>2</sub>), 1.84 (d, 2H, -CH<sub>2</sub>), 1.93 (d, 2H, -CH<sub>2</sub>), 2.24-2.32 (q, 2H, -CH<sub>2</sub>), 4.24- 4.30(m, H, -CH), 7.65 (d, 2H,  $J_o=8.0$  Hz, H-3', 5'), 7.77 (dd, H,  $J_o=8.4$  Hz,  $J_m=1.6$  Hz, H-6), 7.82 (d, 2H,  $J_o=8.4$  Hz, H-2',6'), 8.13 (d, H,  $J_o=8.8$  Hz, H-7), 8.30 (d, H,  $J_m=1.2$  Hz, H-4), 9.34 (br, s, 4H, NH<sub>amidine</sub>).  $^{13}\text{C-NMR}$   $\delta$  ppm (DMSO- $d_6$ ): 24.19, 25.39, 30.44, 57.08, 113.68, 120.20, 121.14, 121.79, 123.90, 129.16, 131.48, 131.90, 137.25, 142.68, 154.68, 165.76. MS (ESI+)  $m/z$ : 397.29 (M+H, 100%), 399.25 (M+H+2, 95%). Anal. Calcd for C<sub>20</sub>H<sub>21</sub>BrN<sub>4</sub> .3 HCl.1,25 H<sub>2</sub>O. 0,65 C<sub>2</sub>H<sub>6</sub>O C: 45.75, H 5.48, N: 10.02, Found; C: 45.53, H: 5.45, N:10.38.

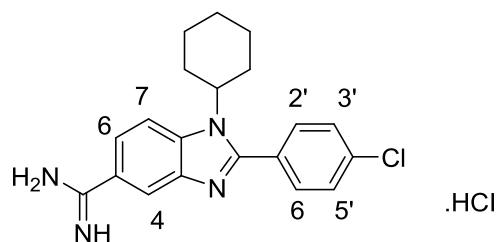

**1-cyclohexyl-2-(4-chlorophenyl)-1H-benzimidazole-5-carboxamide HCl (M5):**

Yield 25%, M.p. 210-212<sup>o</sup>C. <sup>1</sup>H-NMR  $\delta$  ppm (DMSO-d<sub>6</sub>): 1.26-1.65 (m, 4H, -CH<sub>2</sub>), 1.70 (d, 2H, -CH<sub>2</sub>), 1.93 (d, 2H, -CH<sub>2</sub>), 2.24-2.37 (m, 2H, -CH<sub>2</sub>), 4.23-4.30 (m, H, -CH), 7.64 (d, 2H, J<sub>o</sub>=8.4 Hz, H-3',5'), 7.78 (dd, H, J<sub>o</sub>=8.4 Hz, J<sub>m</sub>=1.6 Hz, H-6), 7.82 (d, 2H, J<sub>o</sub>=8.4 Hz, H-2', 6'), 8.13 (d, H, J<sub>o</sub>=8.4 Hz, H-7), 8.30 (d, H, J<sub>m</sub>=1.2 Hz, H-4), 9.36 (br, s, 4H, NH<sub>amidine</sub>). <sup>13</sup>C-NMR  $\delta$  ppm (DMSO-d<sub>6</sub>) : 24.21, 25.41, 30.46, 57.09, 113.69, 120.21, 121.15, 121.81, 123.92, 129.17, 131.91, 137.26, 142.26, 142.69, 154.69, 165.78. MS (ESI+) *m/z*: 353.4 (M+H, 95%), 355.4 (%M+H+2, 40%), 271.3 (%100). Anal. Calcd for C<sub>22</sub>H<sub>27</sub>N<sub>5</sub> · 1,55 HCl · C<sub>2</sub>H<sub>6</sub>O · 0,25 H<sub>2</sub>O. C: 57.45, 4:6.37, N:12.18, Found; C: 57.72, H: 6.15, N: 11.87.

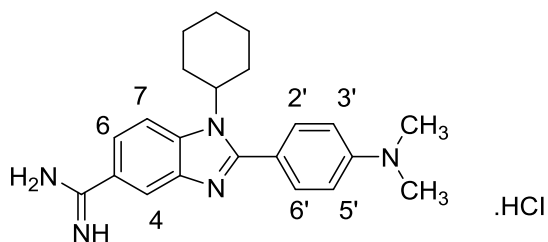

**1-cyclohexyl-2-(4-dimethylaminophenyl)-1H-benzimidazole-5-carboxamide HCl**

**(M6):** Yield: 17%, M.p. 210-212<sup>o</sup>C. <sup>1</sup>H-NMR  $\delta$  ppm (DMSO-d<sub>6</sub>): 1.14-1.63 (m, 4H, -2CH<sub>2</sub>), 1.85 (t, 4H, -2CH<sub>2</sub>), 2.24-2.32 (q, 2H, -CH<sub>2</sub>), 2.99 (s, 6H, -N(CH<sub>3</sub>)<sub>2</sub>), 4.37 (t, H, -CH), 6.85 (d, 2H, J<sub>o</sub>=8.4 Hz, H-3',5'), 7.48 (d, 2H, J<sub>o</sub>=8.4 Hz, H-2', 6'), 7.67 (d, H, J<sub>o</sub>=8.4 Hz, H-6), 8.02 (d, H, J<sub>o</sub>=8.8 Hz, H-7), 8.18 (s, H, H-4), 9.20 (br, s, 4H, NH<sub>amidine</sub>). <sup>13</sup>C-NMR  $\delta$  ppm (DMSO-d<sub>6</sub>) : 24.19, 25.49, 30.35, 56.79, 111.58, 113.16, 116.24, 119.31, 120.64, 120.90, 130.18, 137.38, 142.91, 151.09, 156.55, 165.83. MS (ESI+) *m/z*: 362.5 (M+H, 40%), 280.4 (100%). Anal. Calcd for C<sub>22</sub>H<sub>27</sub>N<sub>5</sub> · 3 HCl · 1.5 C<sub>2</sub>H<sub>6</sub>O C: 55.61, H:7.28, N: 12.97, Found; C:56.05, H:7.33, N:12.80.

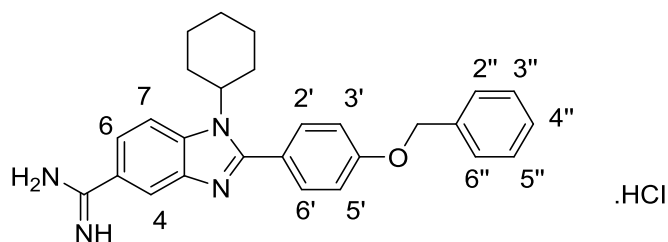

**1-cyclohexyl-2-(4-benzyloxyphenyl)-1H-benzimidazole-5-carboxamide HCl (M7):**

Yield 10%, M.p. 192-195°C. <sup>1</sup>H-NMR δ ppm (DMSO-d<sub>6</sub>): 1.1-1.51 (m, 4H, -2CH<sub>2</sub>), 1.55-1.8 (m, 4H, -2CH<sub>2</sub>), 2.08 (d, 2H, -CH<sub>2</sub>), 3.88-3.94 (t, H, -CH), 5.18 (s, 2H, -OCH<sub>2</sub>), 7.15 (dd, H, H, J<sub>o</sub>=7.2, J<sub>o'</sub>=7.6, H-4''), 7.23-7.33 (m, 5H), 7.44 (dd, H, J<sub>o</sub>=7.2 Hz J<sub>m</sub>=1.6 Hz), 7.58 (m, H), 7.69 (dd, H, J<sub>o</sub>=8.4 Hz, J<sub>m</sub>=1.6 Hz, J<sub>o</sub>=8.4, H-6), 8.00 (d, H, J<sub>o</sub>= 8.0 Hz, H-7), 8.24 (d, H, J<sub>m</sub>=2 Hz, H-4), 9.08 (br, s, 4H, NH<sub>amidine</sub>). <sup>13</sup>C-NMR δ ppm (DMSO-d<sub>6</sub>) : 24.73, 26.00, 27.33, 57.06, 70.28, 113.23, 119.85, 120.43, 121.30, 121.37, 121.88, 128.15, 128.45, 128.81, 132.45, 136.80, 137.15, 143.43, 154.18, 156.79, 166.23 MS (ESI+) *m/z*: 425.28 (M+H, 70%), 343.4 (100%). Anal. Calcd for C<sub>27</sub>H<sub>28</sub>N<sub>4</sub>O. 2HCl . 0,75 H<sub>2</sub>O C: 63.47, H: 6.21, N:10.96, Found; C: 63.78, H: 5.89, N: 11.05.

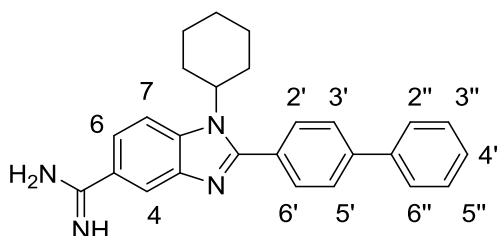

**1-cyclohexyl-2-(1,1'-biphenyl-4-yl)-1H-benzimidazole-5-carboxamide HCl (M8):**

Yield: 15%, M.p. 245°C. <sup>1</sup>H-NMR δ ppm (DMSO-d<sub>6</sub>): 1.22-1.64 (m, 4H, -2CH<sub>2</sub>), 1.85-1.88 (t, 2H, -CH<sub>2</sub>), 1.97 (d, 2H, -CH<sub>2</sub>), 2.28-2.37 (q, 2H, -CH<sub>2</sub>), 4.36-4.42 (m, H, -CH), 7.44-7.46 (d, H, J<sub>o</sub>=8.0, H-6), 7.53 (d, 2H, J<sub>o</sub>=7.6, H-3',5'), 7.76-7.81 (m, 5H, H-2'', 3'', 4'', 5'', 6''), 7.92 (d, 2H, J<sub>o</sub>=8.4, H-2', 6'), 8.14 (d, H, J<sub>o</sub>=8.4, H-7), 8.32 (d, H, J<sub>m</sub>=0.8, H-4), 9.08 (br, s, 4H, NH<sub>amidin</sub>). <sup>13</sup>C-NMR δ ppm (DMSO-d<sub>6</sub>) : 24.22, 25.48, 30.48, 57.06, 113.63, 120.03, 121.26, 121.60, 126.84, 127.03, 128.10, 128.91, 129.10, 130.02, 137.29, 139.03, 141.68, 142.84, 155.43, 165.90 MS (ESI+) *m/z*: 395.6 (M+H, 70%), 313.2 (100%). Anal. Calcd for C<sub>26</sub>H<sub>26</sub>N<sub>4</sub>. 0,75 HCl. 1,45 C<sub>2</sub>H<sub>6</sub>O. H<sub>2</sub>O C: 70.99, H:6.59, N:12.74, Found; C: 70.80, H: 6.41, N: 12.98.



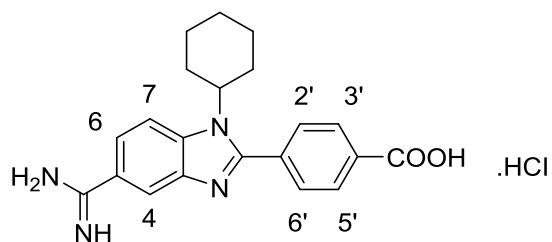

**1-cyclohexyl-2-(4-carboxyphenyl)-1H-benzimidazole-5-carboxamide HCl (M9):**

Yield: 55%, M.p. 280-282°C. <sup>1</sup>H-NMR δ ppm (DMSO-d<sub>6</sub>): 1.25-1.65 (m, 4H, -2CH<sub>2</sub>), 1.83 (d, 2H, -CH<sub>2</sub>), 1.92 (d, 2H, -CH<sub>2</sub>), 2.24-2.31 (q, 2H, -CH<sub>2</sub>), 4.24-4.30 (m, H, -CH), 7.67 (d, 2H, J<sub>o</sub>=8 Hz, H-2',6'), 7.80 (dd, H, J<sub>o</sub>=8.4 Hz, J<sub>m</sub>=1.6 Hz, H-6), 7.86 (d, 2H, J<sub>o</sub>=8.4 Hz, H-3',5'), 8.16 (d, H, J<sub>o</sub>=8.8 Hz, H-7), 8.35 (d, H, J<sub>m</sub>=1.2 Hz, H-4). <sup>13</sup>C-NMR δ ppm (DMSO-d<sub>6</sub>): 24.18, 25.40, 30.48, 57.10, 115.67, 120.90, 121.33, 121.79, 123.98, 129.15, 131.34, 131.87, 137.25, 142.85, 154.71, 165.61, 168.85. MS (ESI+) *m/z*: 363.24 (M+H). Anal. Calcd for C<sub>21</sub>H<sub>22</sub>N<sub>4</sub>O<sub>2</sub>·3HCl. C: 69.59, H:6.12, N:15.46, Found; C: 70.01, H: 6.15, N: 14.01.

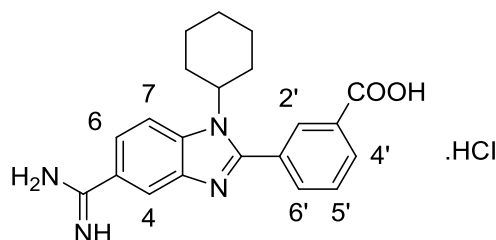

**1-cyclohexyl-2-(3-carboxyphenyl)-1H-benzimidazole-5-carboxamide HCl (M10):**

Yield: 25%, M.p. 254-256°C. <sup>1</sup>H-NMR δ ppm (DMSO-d<sub>6</sub>): 1.21-1.65 (m, 4H, -2CH<sub>2</sub>), 1.87 (d, 2H, -CH<sub>2</sub>), 1.90 (d, 2H, -CH<sub>2</sub>), 2.24-2.34 (m, 2H, -CH<sub>2</sub>), 4.24-4.28 (m, H, -CH), 7.51-7.56 (m, 3H, H-4',5',6'), 7.66-7.71 (m, H, H-2'), 7.75 (dd, H, J<sub>o</sub>=8.4 Hz, J<sub>m</sub>=2 Hz, H-6), 8.15 (d, H, J<sub>o</sub>=8.8 Hz, H-7), 8.28 (d, H, J<sub>m</sub>=1.6 Hz, H-4). <sup>13</sup>C-NMR δ ppm (DMSO-d<sub>6</sub>): 24.13, 25.37, 30.85, 57.08, 113.65, 116.60, 119.94, 121.41, 122.47, 125.63, 131.18, 132.14, 136.48, 143.49, 154.55, 161.72, 163.54, 165.08, 168.87. MS (ESI+) *m/z*: 363.5 (M+H, 70%), 281.4 (100%). Anal. Calcd for C<sub>21</sub>H<sub>22</sub>N<sub>4</sub>O<sub>2</sub>·1,75 HCl. 0,8 H<sub>2</sub>O.0,5 C<sub>2</sub>H<sub>6</sub>O; C: 56.99, H:6.16, N:12,08 Found; C: 57.35, H: 6.01, N: 11.69.

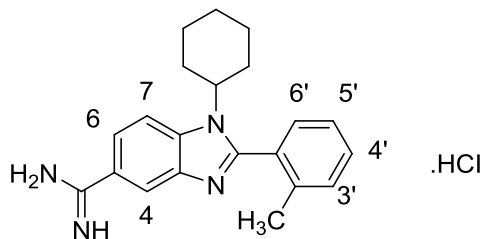

**1-cyclohexyl-2-(2-methylphenyl)-1H-benzimidazole-5-carboxamide HCl (M11):**

Yield: 24%, M.p. 184-186°C. <sup>1</sup>H-NMR δ ppm (DMSO-d<sub>6</sub>): 1.15-1.39 (m, 4H, -2CH<sub>2</sub>), 1.62-1.84 (m, 4H, -2CH<sub>2</sub>), 2.19 (2H, -CH<sub>2</sub>), 2.51 (s, 3H, -CH<sub>3</sub>), 3.84-3.90 (t, H, -CH), 7.13-7.17 (m, H, H-3'), 7.25 (d, H, J<sub>o</sub>= 8.4 Hz, H-4'), 7.42 (dd, H, J<sub>o</sub>= 7.6 Hz, J<sub>m</sub>=1.6 Hz, H-5'), 7.58-7.62 (m, H, H-6'), 7.73 (dd, H, J<sub>o</sub>=8.8 Hz, J<sub>m</sub>=2 Hz, H-6), 8.01 (d, H, J<sub>o</sub>=8.8 Hz, H-7), 8.25 (s, H, H-4). <sup>13</sup>C-NMR δ ppm (DMSO-d<sub>6</sub>): 17.25, 24.31, 25.57, 30.84, 57.05, 113.60, 116.57, 119.80, 121.53, 122.37, 125.60, 131.01, 132.19, 136.84, 142.65, 154.15, 160.71, 163.15, 166.01. MS (ESI+) *m/z*: 333.5 (M+H, 95%), 251.3 (100%). Anal. Calcd for C<sub>21</sub>H<sub>24</sub>N<sub>4</sub>.HCl . 0,5 C<sub>2</sub>H<sub>6</sub>O. 0,25 H<sub>2</sub>O; C :66.65, H:7.25, N:14.13, Found; C:66.81, H:6.89, N:14.45.

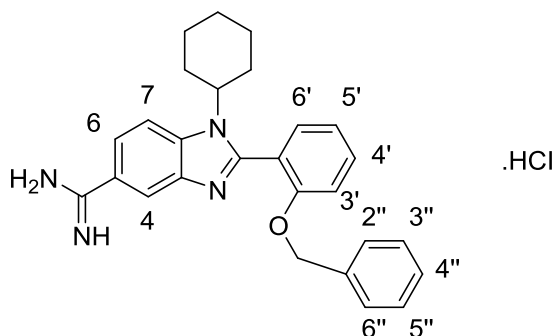

**1-cyclohexyl-2-(2-benzyloxyphenyl)-1H-benzimidazole-5-carboxamide HCl (M12):**

Yield: 20%, M.p. 192-195°C. <sup>1</sup>H-NMR δ ppm (DMSO-d<sub>6</sub>) : 1.17-1.51 (m, 4H, -2CH<sub>2</sub>), 1.53-1.85 (m, 4H, -2CH<sub>2</sub>), 2.18 (d, 2H, -CH<sub>2</sub>), 3.90-3.97 (t, H, -CH), 5.25 (s, 2H, -OCH<sub>2</sub>), 7.13-7.17 (m, H), 7.24-7.34 (m, 6H), 7.44 ( dd, H, J<sub>o</sub>=1.6 Hz, J<sub>m</sub>=7.2 Hz), 7.56-7.61 ( m, H), 7.69 (dd, H, J<sub>o</sub>=8.4 Hz, J<sub>m</sub> =1.6 Hz) , 8.00 (d, H, J<sub>o</sub>= 8.0 Hz), 8.25 (d, H, J<sub>m</sub>=2 Hz) , 9.08 (br, s, 4H, NH<sub>amidine</sub>). <sup>13</sup>C-NMR δ ppm (DMSO-d<sub>6</sub>): 24.75, 26.04, 27.08, 57.06, 71.05, 113.65, 120.06, 121.28, 122.40, 124.80, 126.75, 127.04, 128.93, 129.16, 130.02, 132.25, 137.34, 138.03, 141.68, 144.84, 157.43, 165.80. MS (ESI+) *m/z*: 425.28 (M+H, 70%), 335.39 (100%). Anal. Calcd for C<sub>27</sub>H<sub>28</sub>N<sub>4</sub>O. 1,5 HCl . 0,25 C<sub>2</sub>H<sub>6</sub>O . 0,5 H<sub>2</sub>O; C: 52.65, H:5.70, N:8.93, Found; C: 52.41, H:5.88, N:9.08.

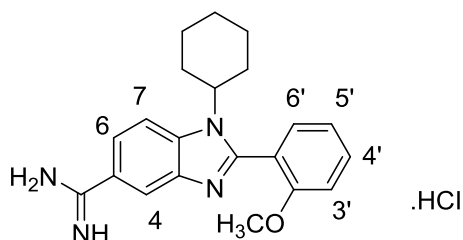

**1-cyclohexyl-2-(2-methoxyphenyl)-1H-benzimidazole-5-carboxamide HCl (M13):**

Yield: 13%, M.p. 198-202°C. <sup>1</sup>H-NMR δ ppm (DMSO-d<sub>6</sub>): 1.14-1.39 (m, 4H, -2CH<sub>2</sub>), 1.61-1.81 (m, 4H, -2CH<sub>2</sub>), 2.18 (2H, -CH<sub>2</sub>), 3.80 (s, 3H, -OCH<sub>3</sub>), 4.04-4.10 (t, H, -CH), 7.12-7.16 (m, H, H-3'), 7.24 (d, H, J<sub>o</sub>= 8.4 Hz, H-5'), 7.44 (dd, H, J<sub>o</sub>= 7.6 Hz, J<sub>m</sub>=1.6 Hz, H-4'), 7.57-7.63 (m, H, H-6'), 7.71 (dd, H, J<sub>o</sub>=8.8 Hz, J<sub>m</sub>=2 Hz, H-6), 8.02 (d, H, J<sub>o</sub>=8.8 Hz, H-7), 8.30 (s, H, H-4). <sup>13</sup>C-NMR δ ppm (DMSO-d<sub>6</sub>): 24.81, 25.23, 31.86, 57.05, 61.25, 113.68, 116.55, 118.72, 121.35, 121.89, 125.61, 132.01, 132.19, 137.47, 143.15, 154.57, 160.72, 163.51, 165.18. MS (ESI+) *m/z*: 349.2 (M+H, 100%), 267.1 (100%). Anal. Calcd for C<sub>21</sub>H<sub>24</sub>N<sub>4</sub>O. 3 HCl. C: 55.09, H:5.94, N:12.24, Found; C: 55.18, H:6.05, N:12.60.

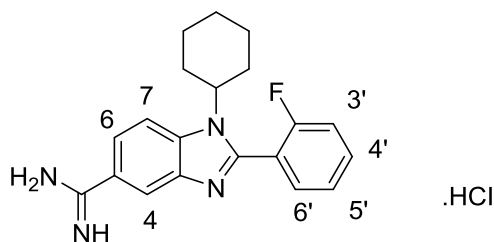

**1-cyclohexyl-2-(2-fluorophenyl)-1H-benzimidazole-5-carboxamide HCl (M14):**

Yield: 9%, M.p. 242-244°C. <sup>1</sup>H-NMR δ ppm (DMSO-d<sub>6</sub>): 1.20-1.62 (m, 4H, -2CH<sub>2</sub>), 1.81-1.87 (q, 4H, -2CH<sub>2</sub>), 2.17-2.25 (m, 2H, -CH<sub>2</sub>), 3.98-4.04 (t, H, -CH), 7.43-7.51 (m, 2H, H-3',5'), 7.64-7.74 (m, 2H, H-4', 6'), 7.76 (dd, H, J<sub>o</sub>=8.0, J<sub>m</sub>=1.6, H-6), 8.13 (d, H, J<sub>o</sub>=8.8, H-7), 8.29 (d, H, J<sub>m</sub>=1.2, H-4). <sup>13</sup>C-NMR δ ppm (DMSO-d<sub>6</sub>): 24.85, 25.52, 31.58, 57.08, 112.58, 115.77, 119.88, 122.53, 123.74, 126.87, 132.21, 133.87, 136.83, 142.47, 154.18, 161.58, 163.21, 167.01. MS (ESI+) *m/z*: 337.2 (M+H, 100%), 255.1 (100%). Anal. Calcd for C<sub>20</sub>H<sub>21</sub>FN<sub>4</sub>.1,25 HCl . 0,5 C<sub>2</sub>H<sub>6</sub>O C: 62.89, H:5.87, N:14.67 Found; C: 63.05, H:5.87, N:14.67.

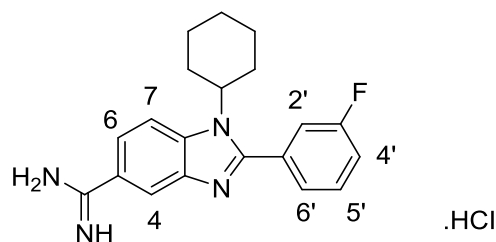

**1-cyclohexyl-2-(3-fluorophenyl)-1H-benzimidazole-5-carboxamide HCl (M15):**

Yield 10%, M.p. 224-226°C. <sup>1</sup>H-NMR δ ppm (DMSO-d<sub>6</sub>): 1.17-1.63 (m, 4H, -2CH<sub>2</sub>), 1.84 (d, 2H, -CH<sub>2</sub>), 1.95 (d, 2H, -CH<sub>2</sub>), 2.22-2.31 (m, 2H, -CH<sub>2</sub>), 4.23-4.29 (m, H, -CH), 7.44-7.53 (m, 3H, H-4', 5', 6'), 7.64-7.69 (m, H, H-2'), 7.72 (dd, H, J<sub>o</sub>=8.4 Hz, J<sub>m</sub>=2 Hz, H-6), 8.09 (d, H, J<sub>o</sub>=8.8 Hz, H-7), 8.25 (d, H, J<sub>m</sub>=1.6 Hz, H-4). <sup>13</sup>C-NMR δ ppm (DMSO-d<sub>6</sub>): 24.21, 25.44, 30.43, 57.05, 113.60, 116.34, 119.80, 121.53, 122.37, 125.58, 132.01, 132.21, 136.84, 142.65, 154.15, 160.71, 163.15, 166.01. MS (ESI+) *m/z*: 337.5 (M+H, 100%), 255.0 (50%). Anal. Calcd for C<sub>20</sub>H<sub>21</sub>FN<sub>4</sub>·2,25HCl·C<sub>2</sub>H<sub>6</sub>O·0,5 H<sub>2</sub>O; C:55.80, H:6.44, N:11.83 Found; C:55.47, H: 6.87, N:12.01.

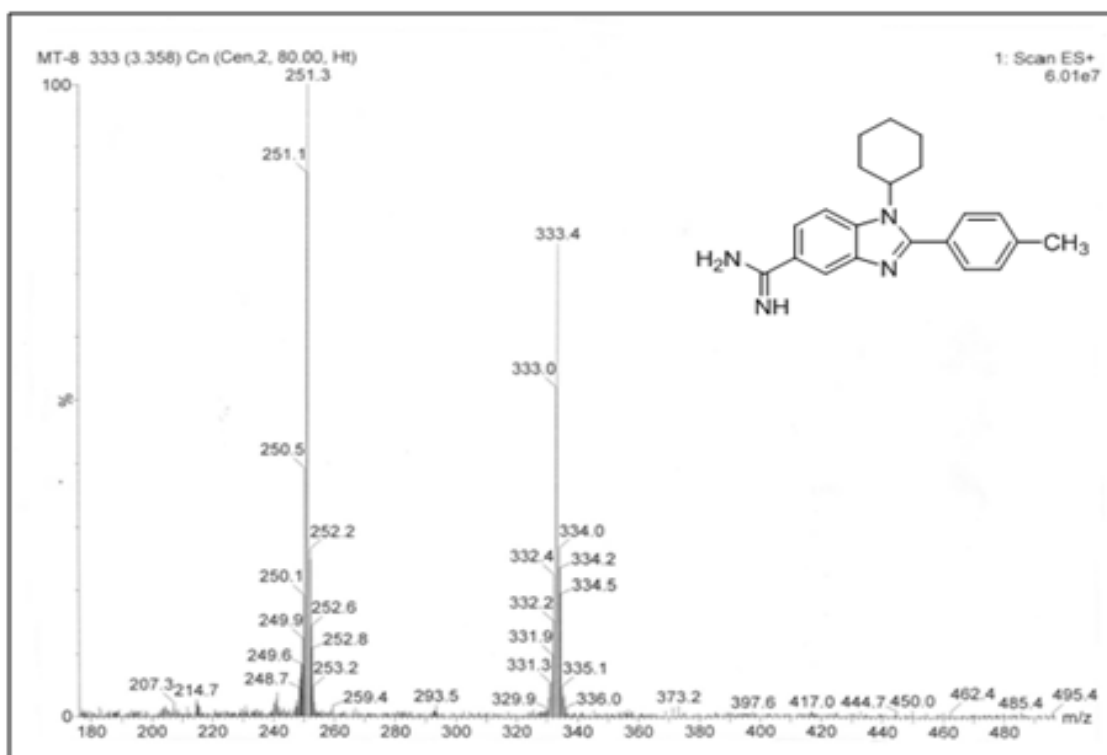

Figure 1. MASS spectra of M1

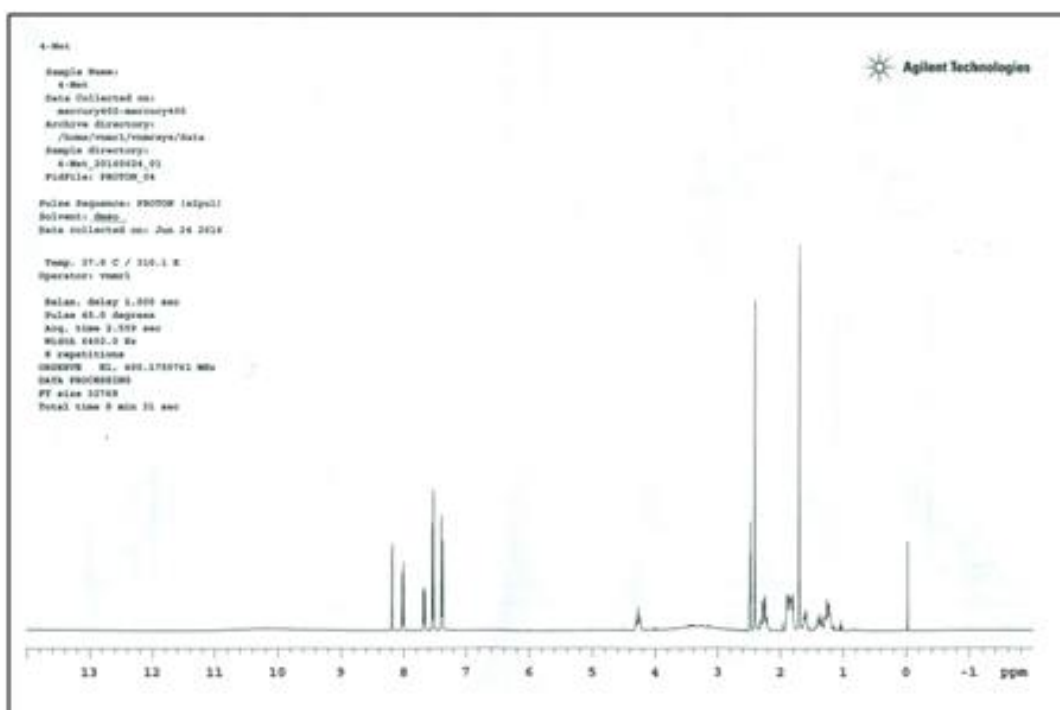

Figure 2. <sup>1</sup>H-NMR spectra of M1



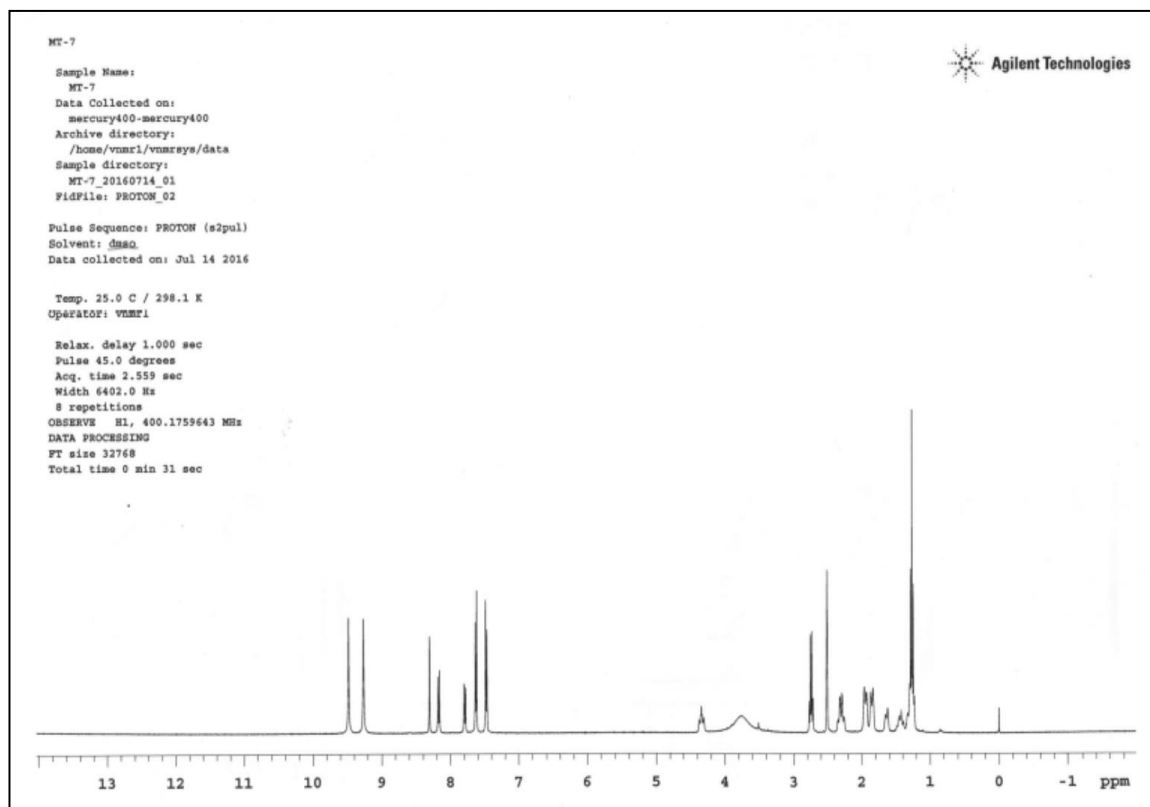Figure 5. <sup>1</sup>H-NMR spectra of M2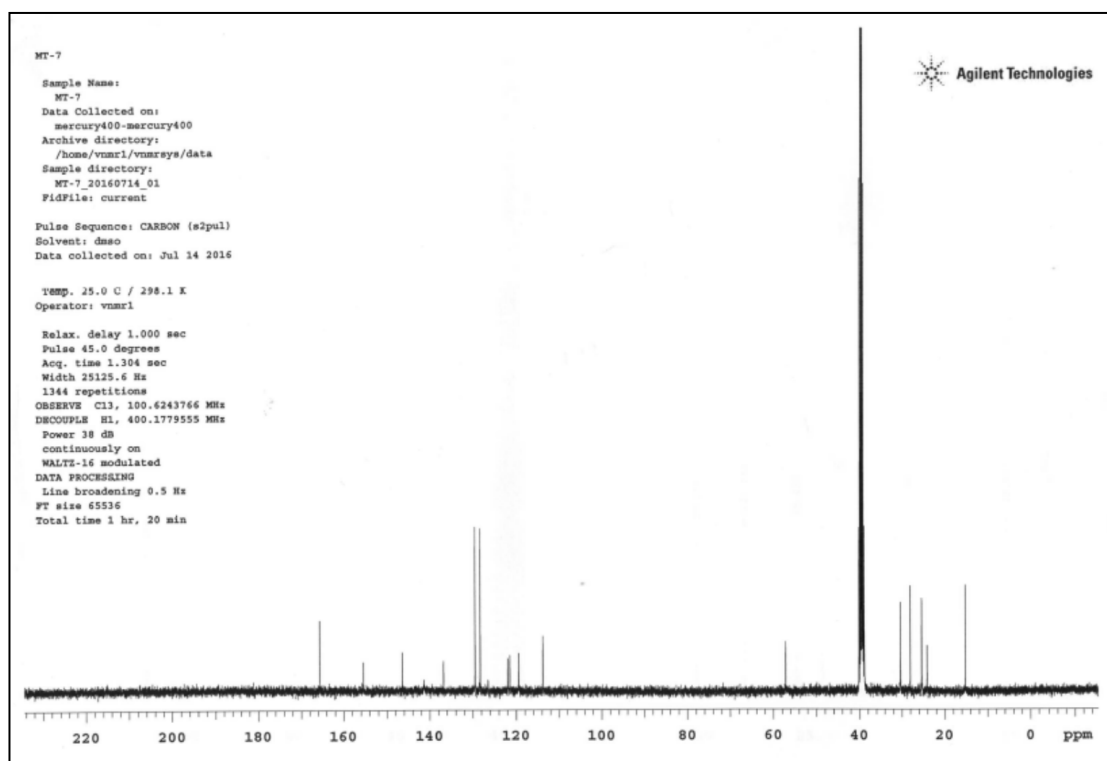Figure 6. <sup>13</sup>C-NMR spectra spectrum of M2

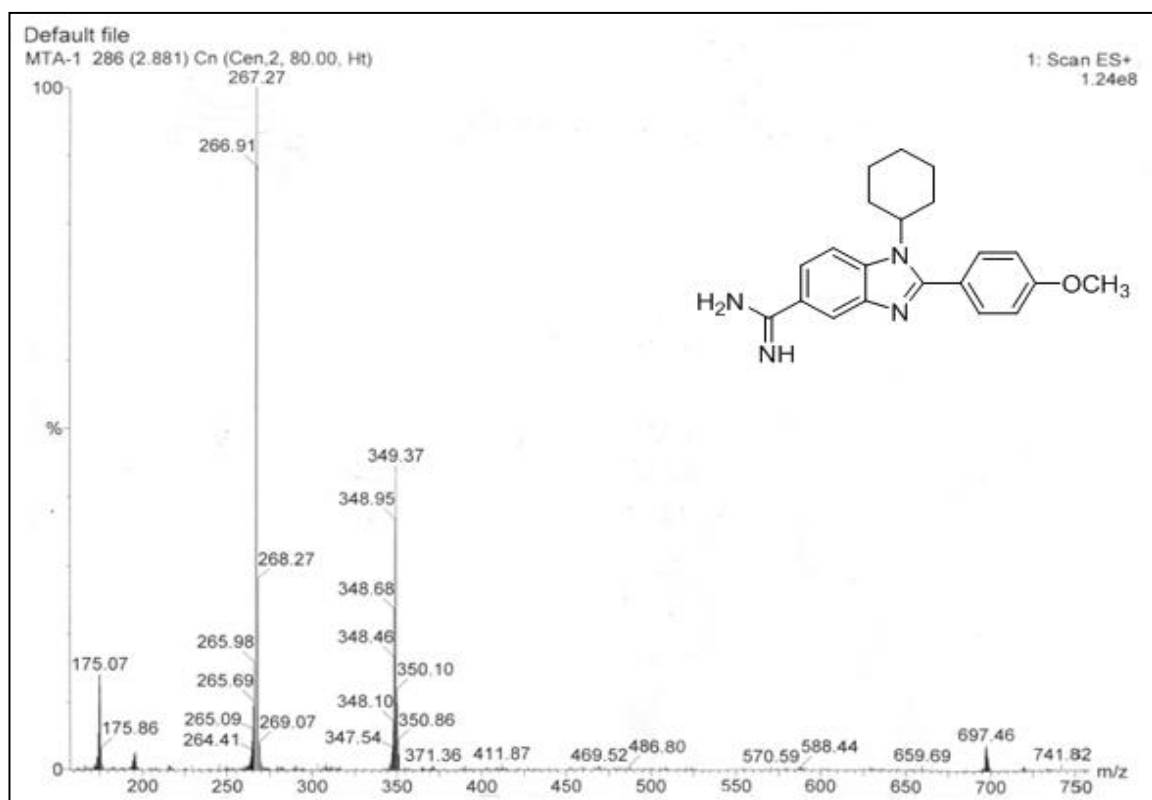

Figure 7. MASS spectra of M3

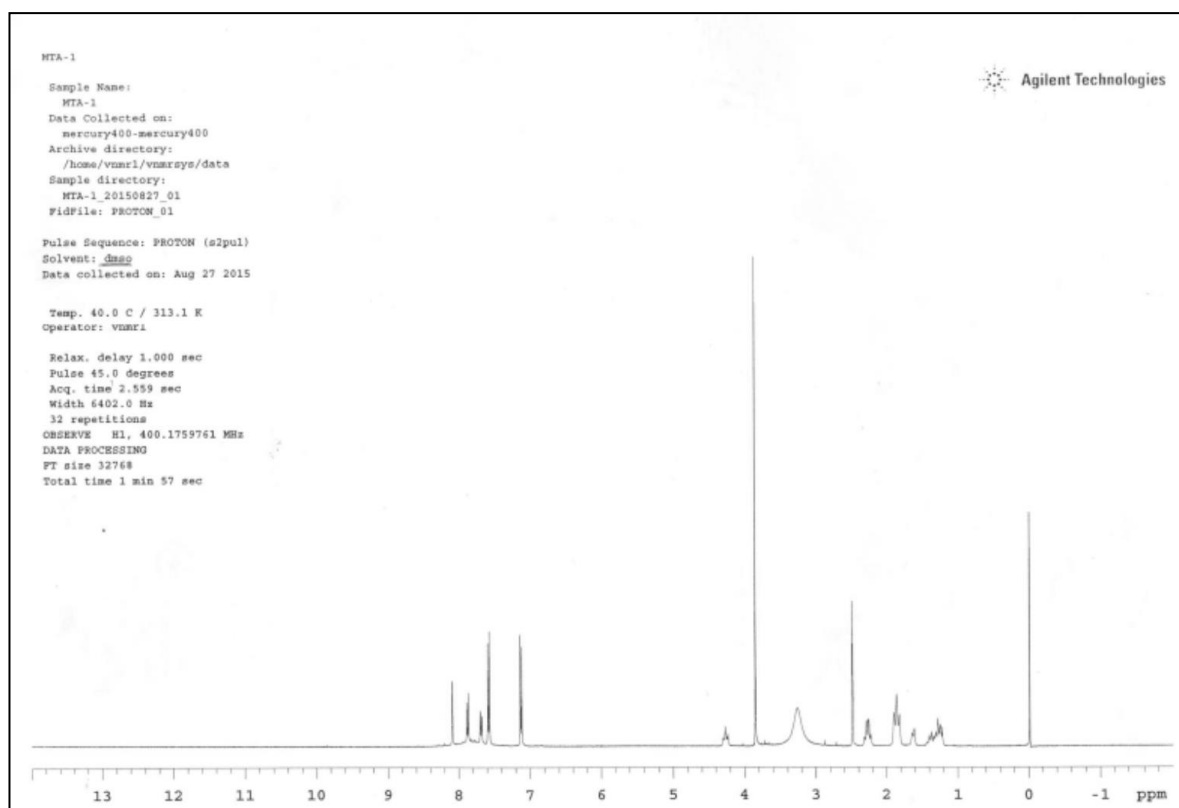

Figure 8. <sup>1</sup>H-NMR spectra of M3



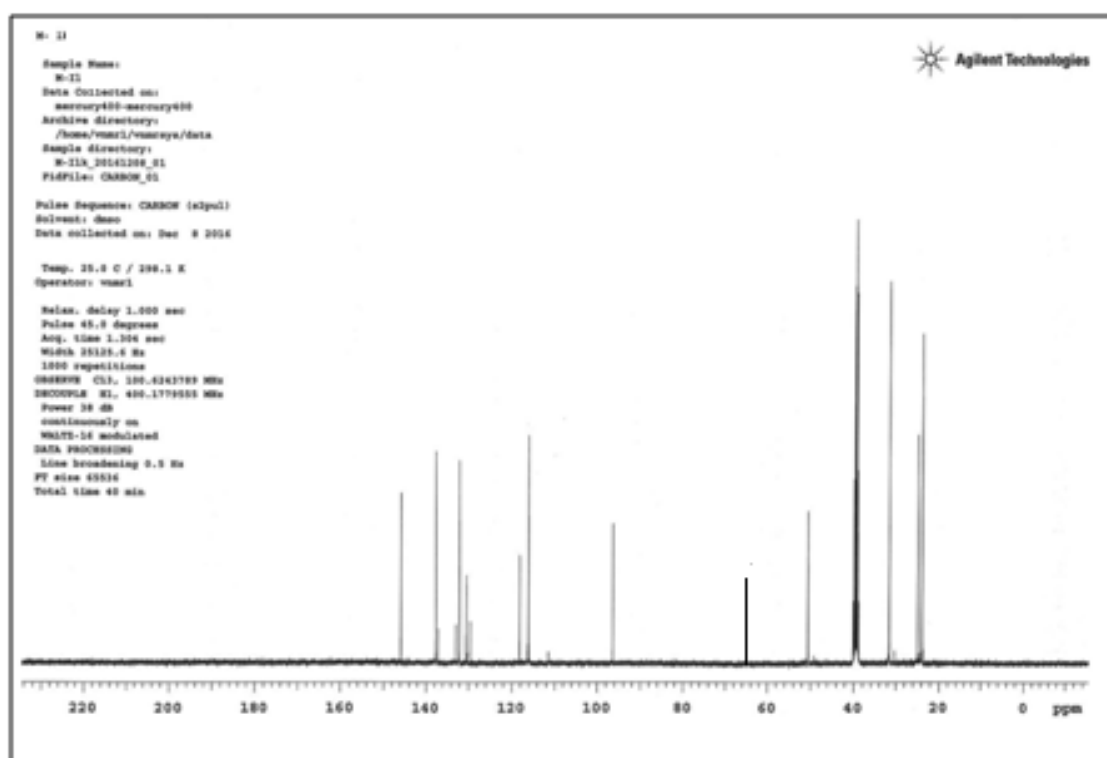

Figure 9.  $^{13}\text{C}$ -NMR spectra of M3

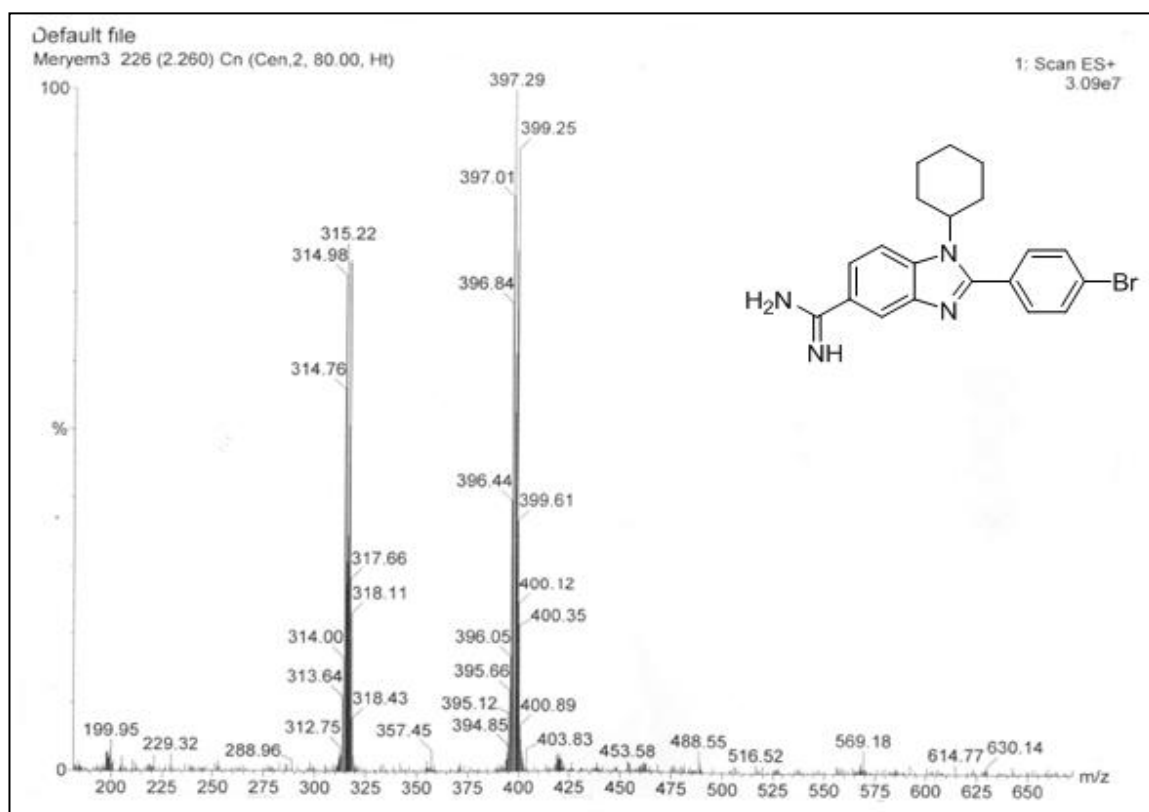

Figure 10. MASS spectra of M4

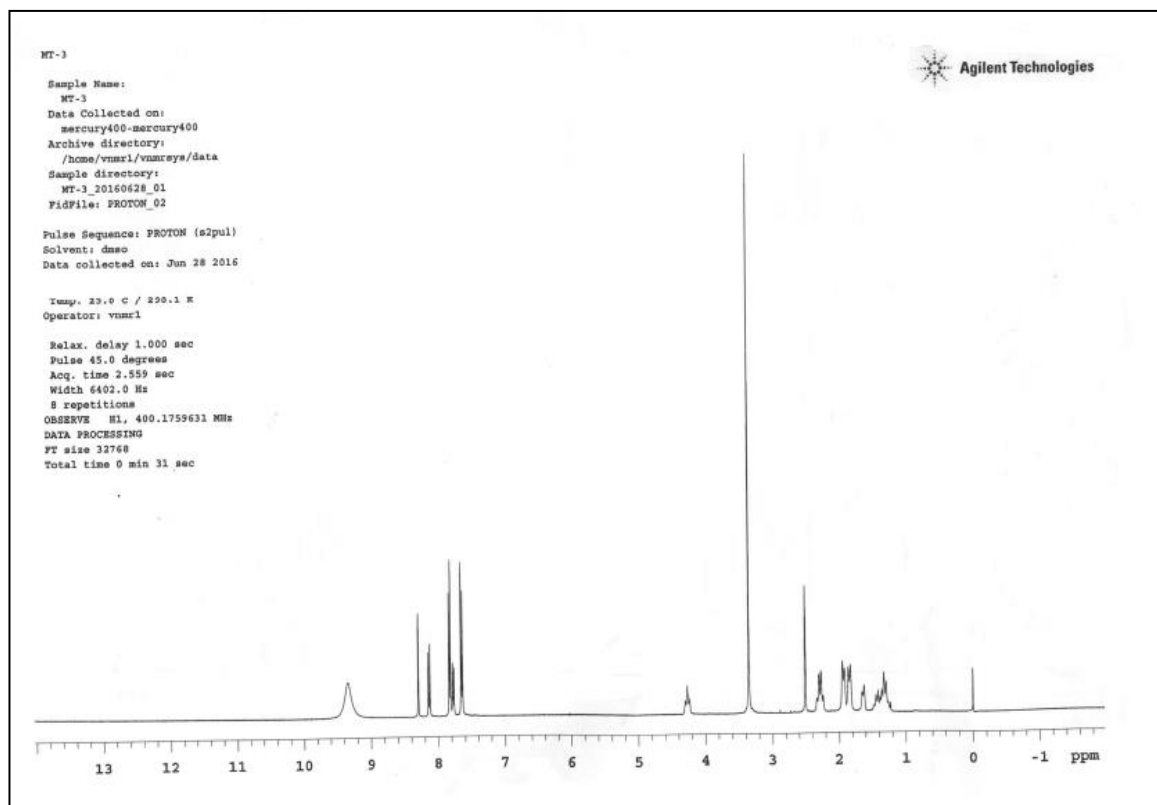

Figure 11.  $^1\text{H}$ -NMR spectra of M4

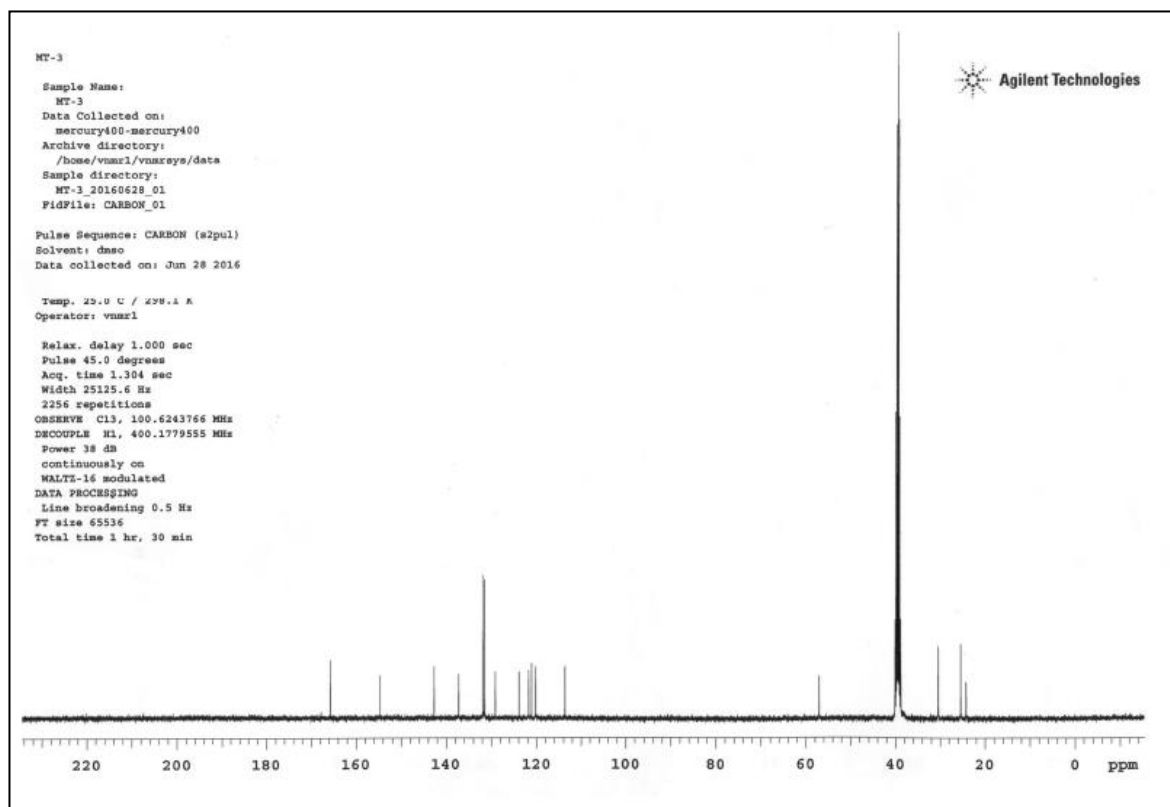

Figure 12.  $^{13}\text{C}$ -NMR spectra of M4

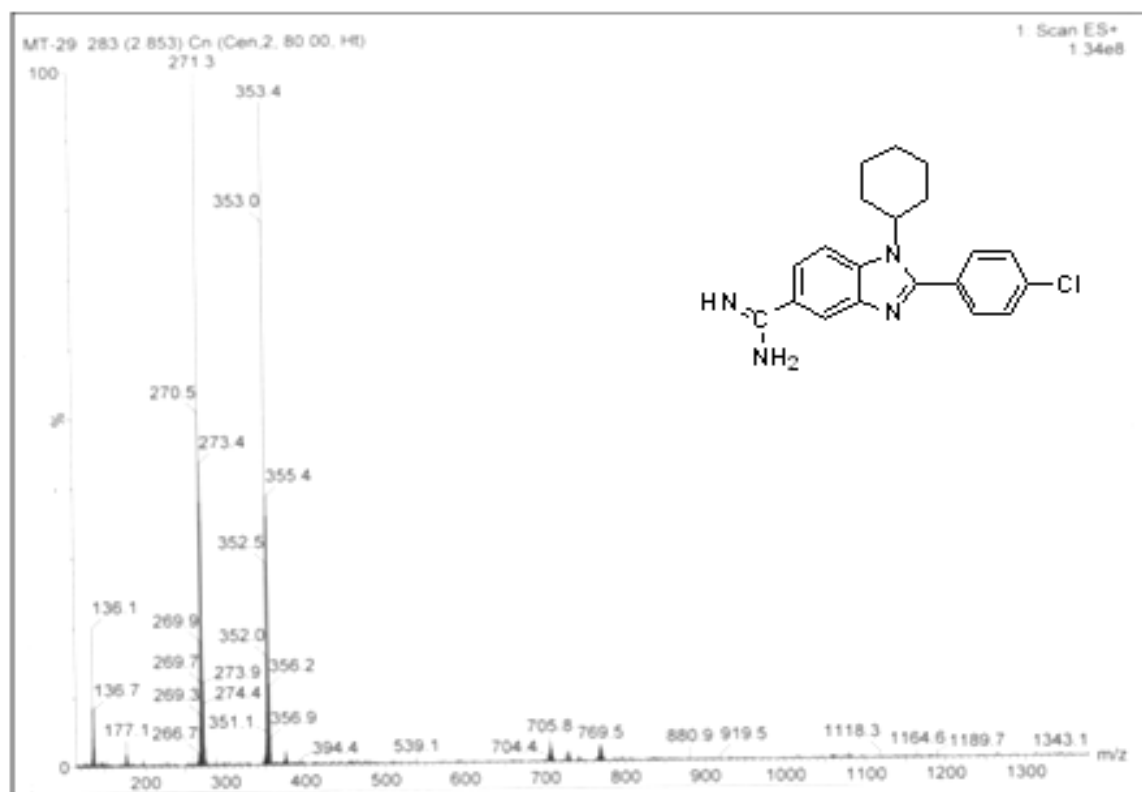

Figure 13. MASS spectra of M5

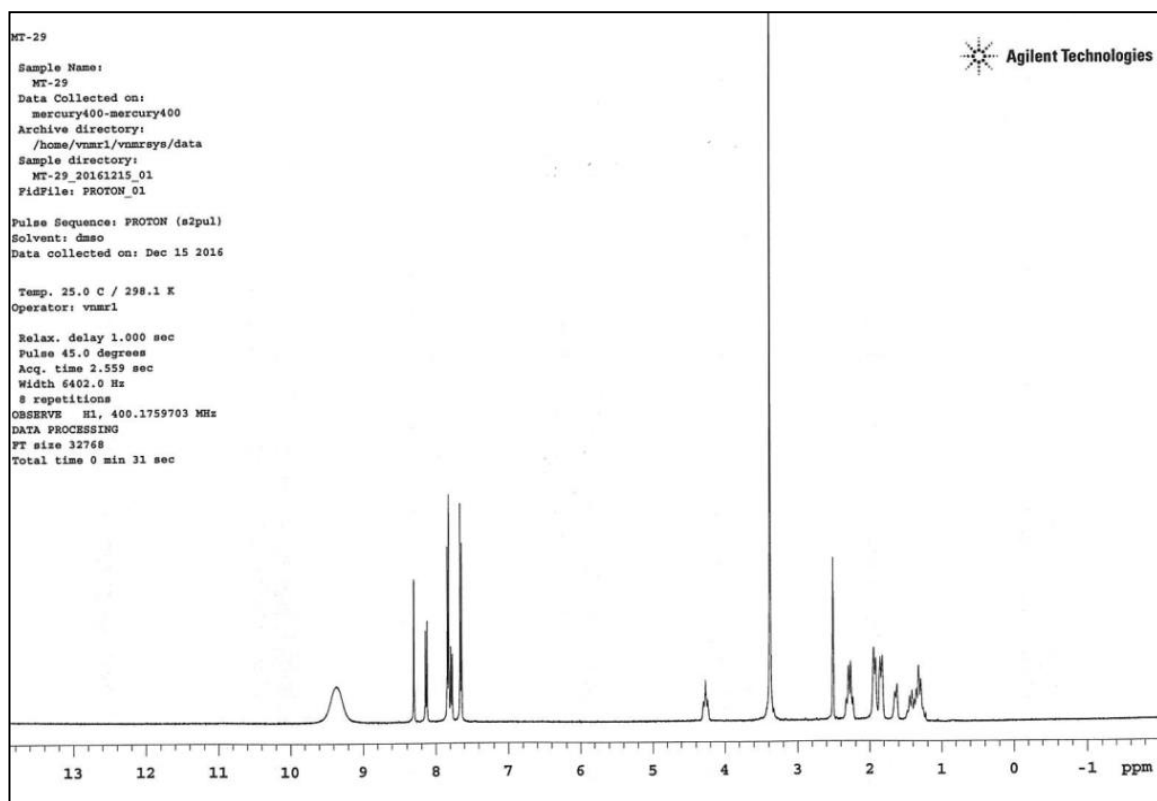

Figure 14. <sup>1</sup>H-NMR spectra of M5

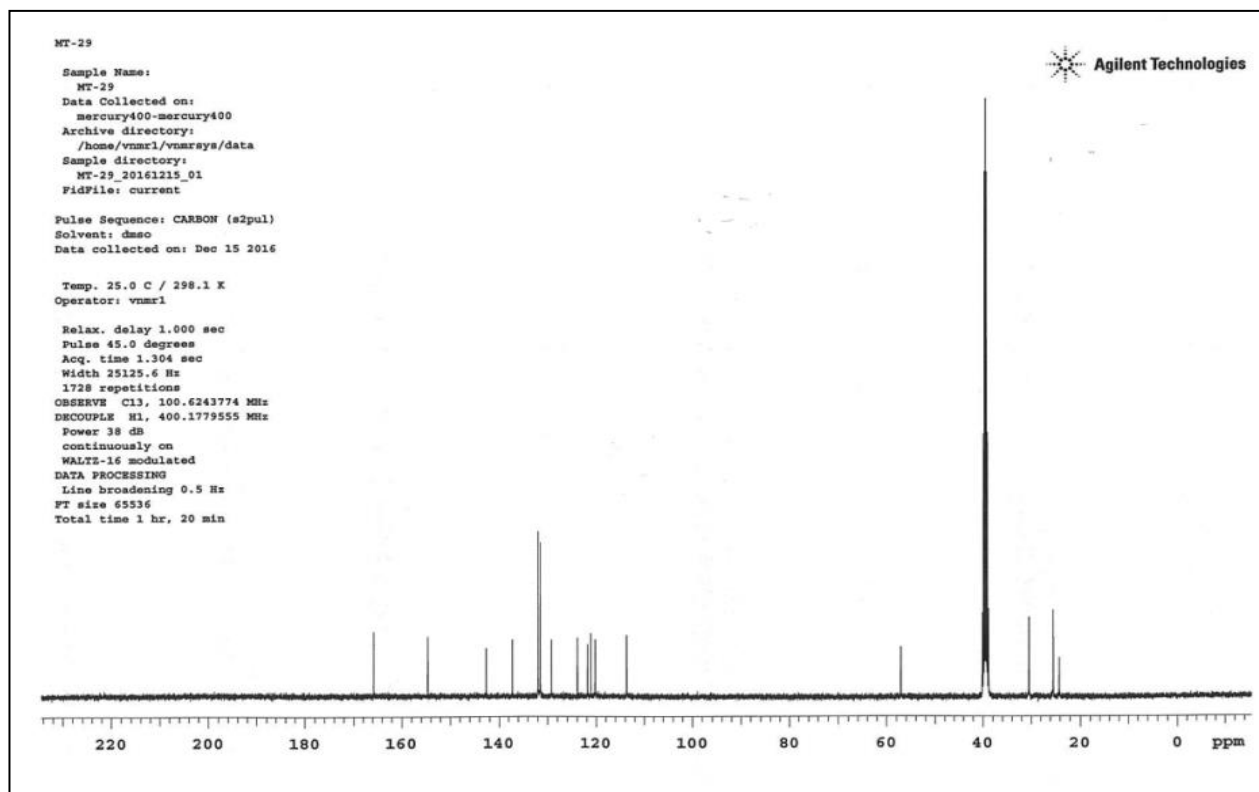Figure 15.  $^{13}\text{C}$ -NMR spectra of M5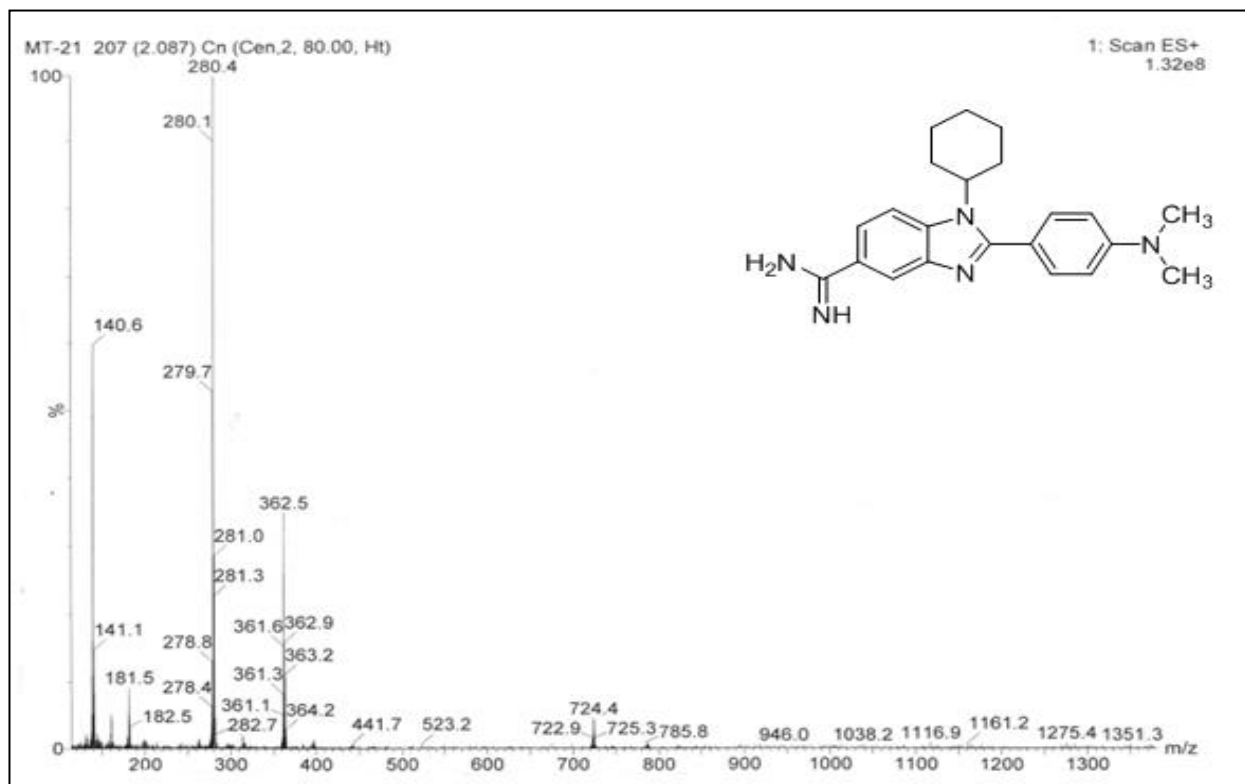

Figure 16. MASS spectra of M6

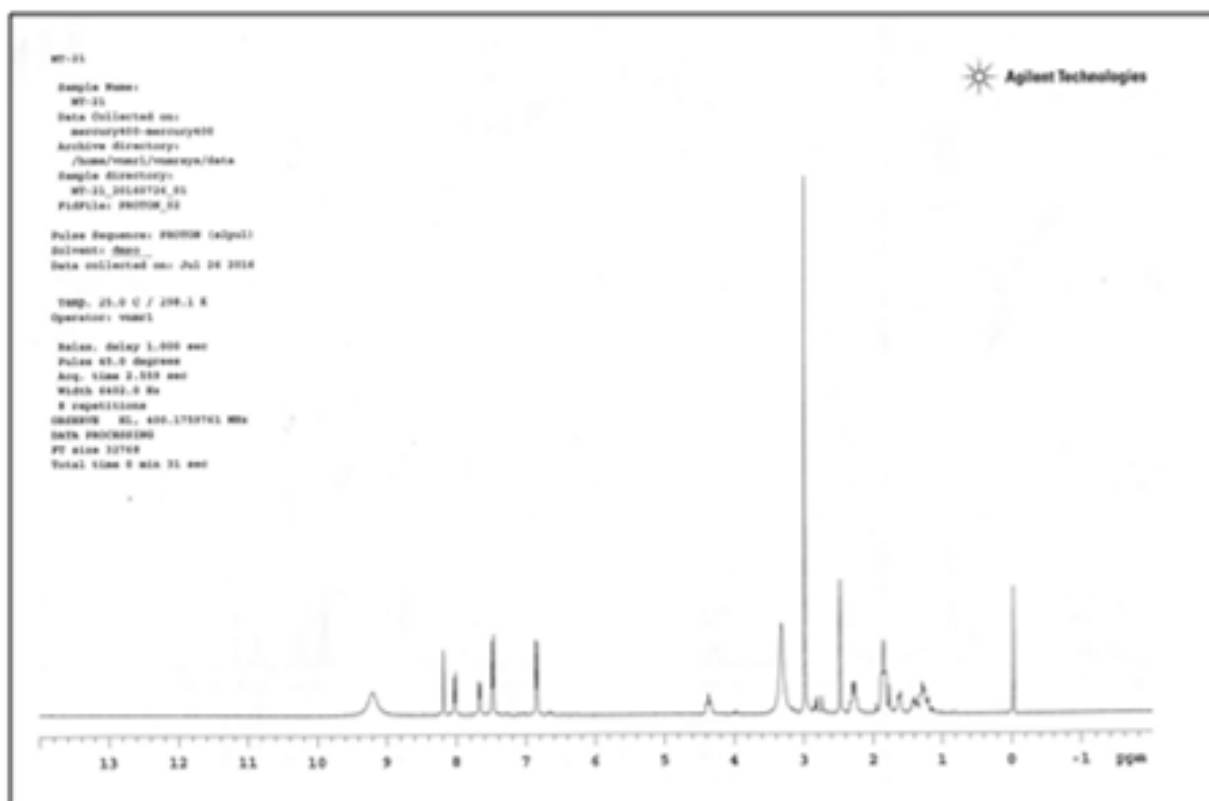

Figure 17.  $^1\text{H-NMR}$  spectra of M6

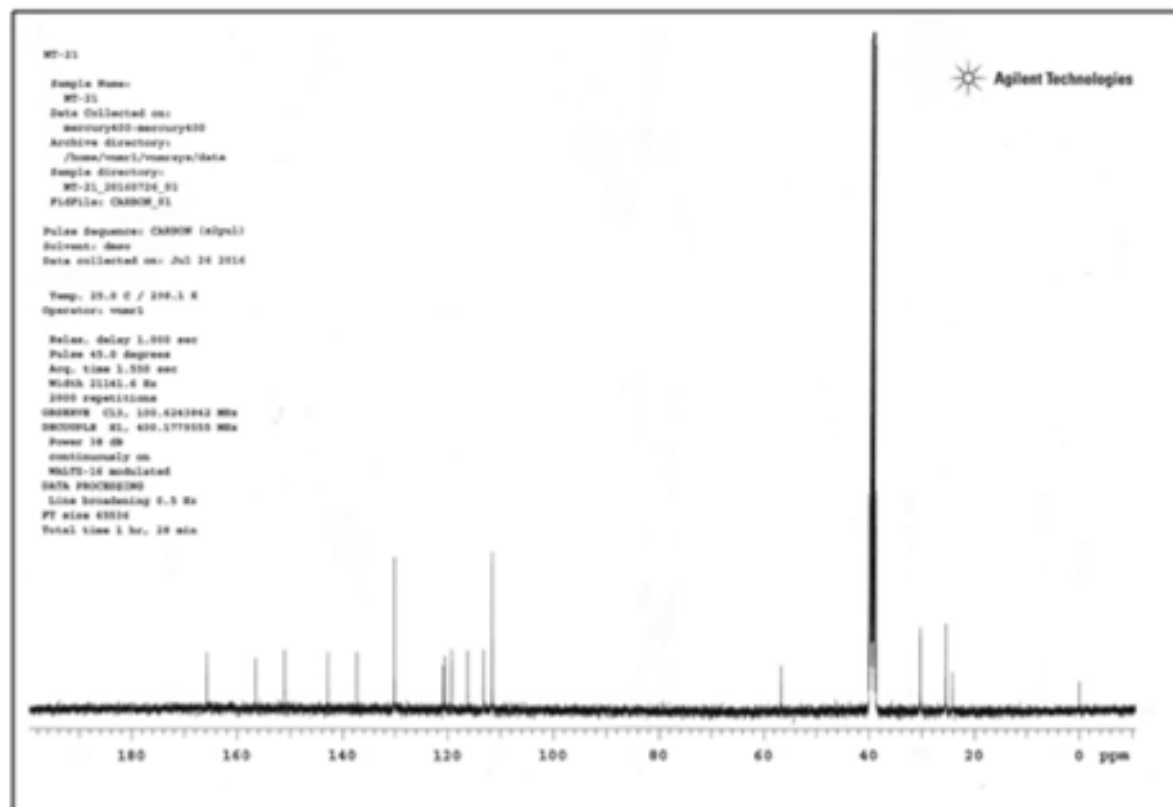

Figure 18.  $^{13}\text{C-NMR}$  spectra of M6

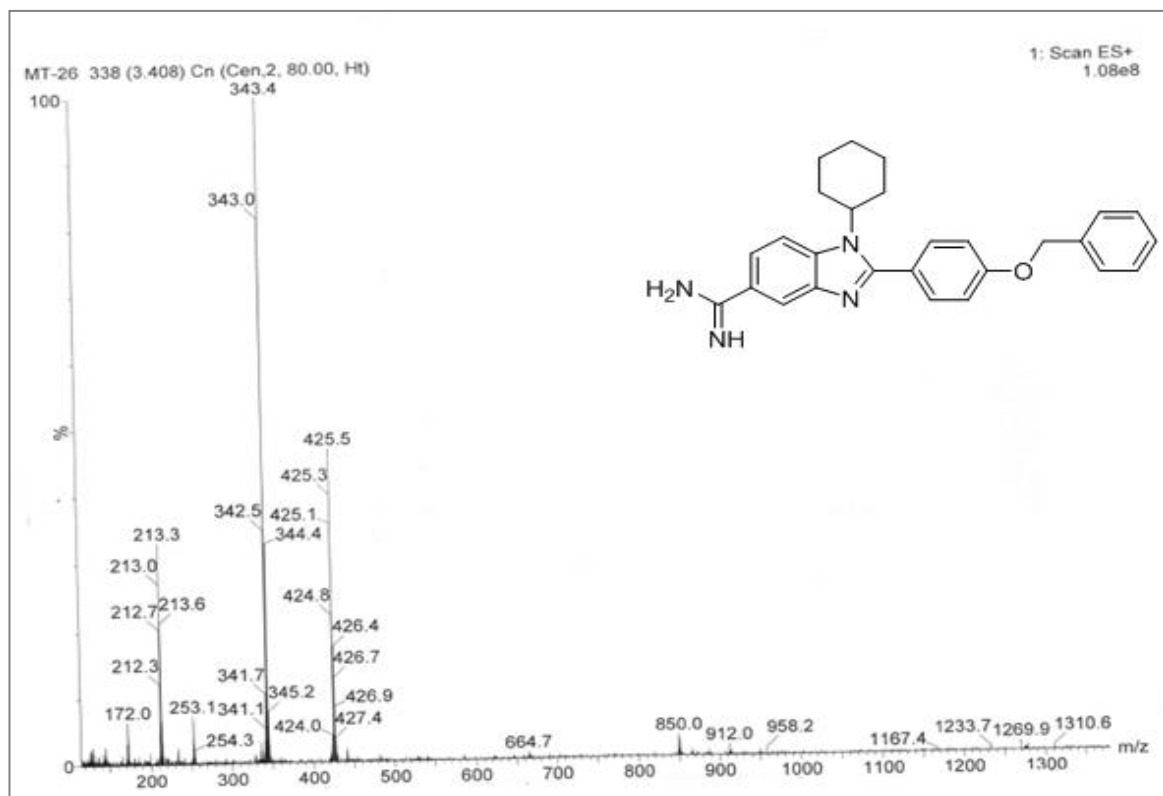

Figure 19. MASS spectra of M7

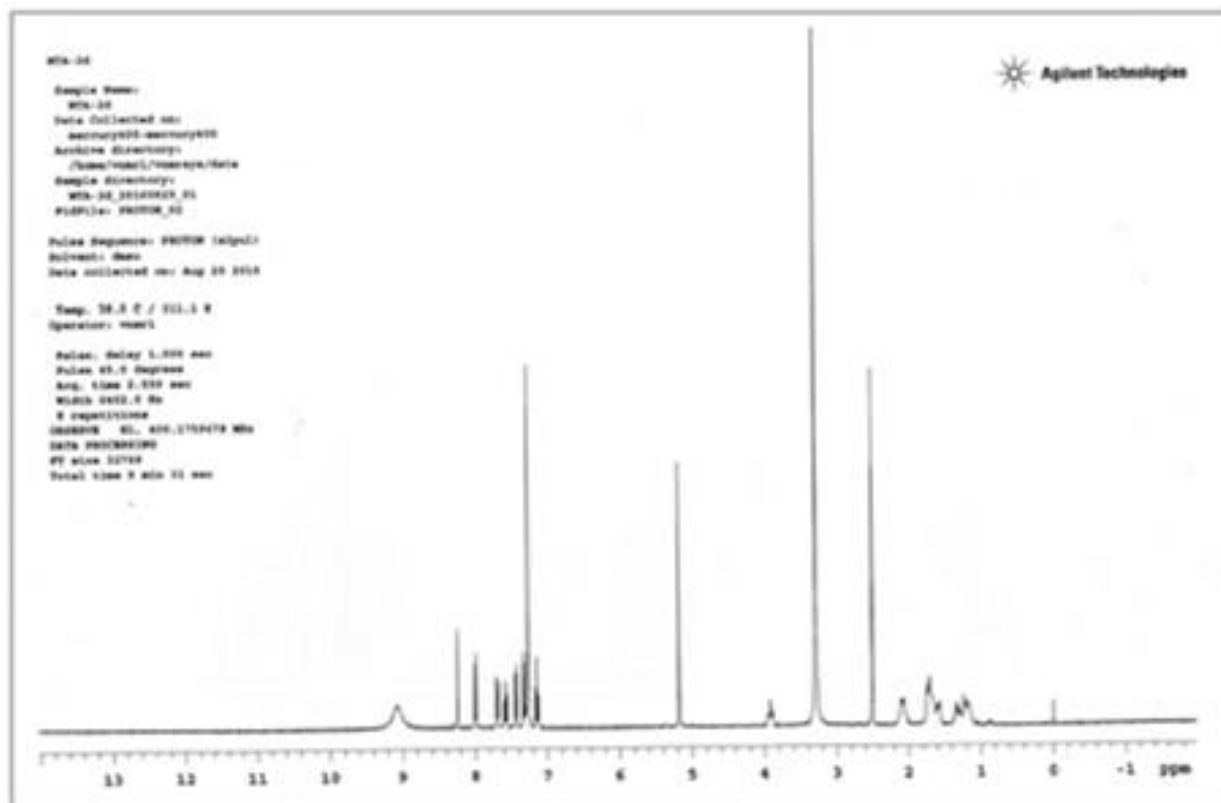

Figure 20. <sup>1</sup>H-NMR spectra of M7

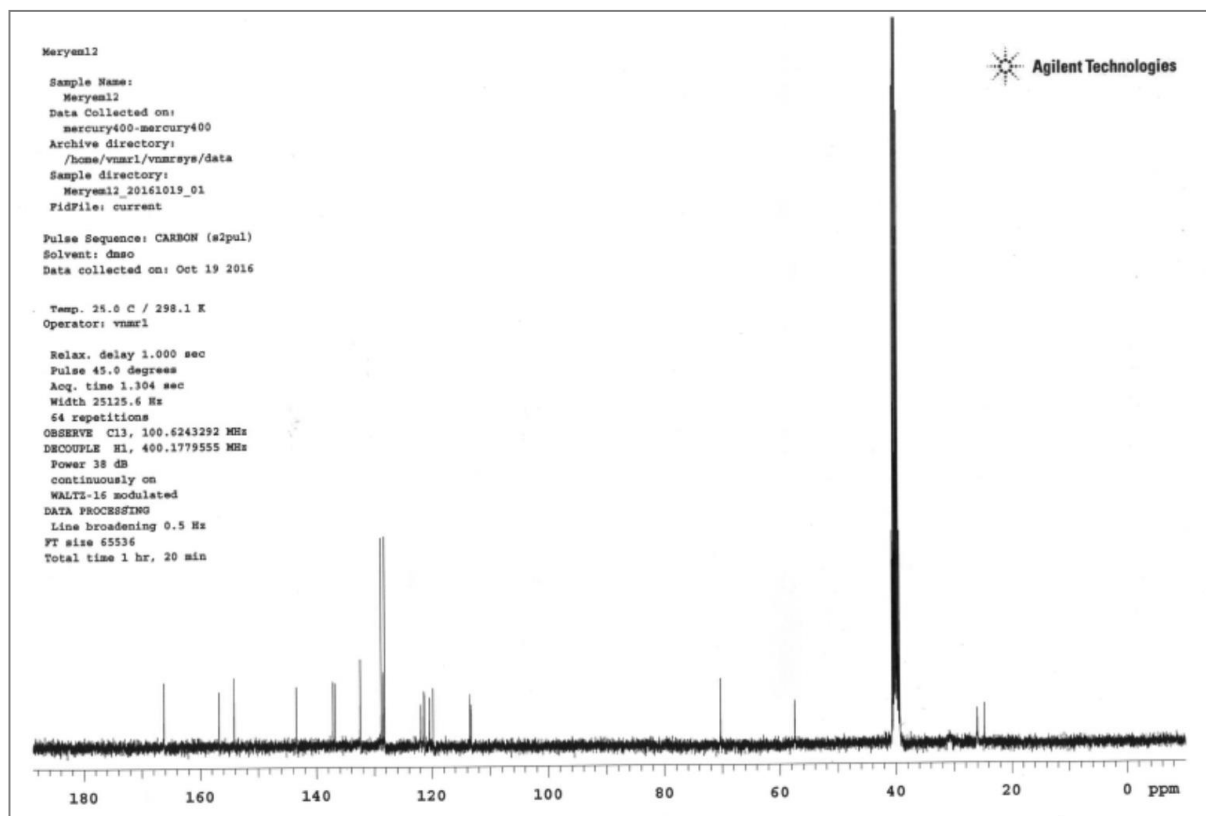

Figure 21.  $^{13}\text{C}$ -NMR spectra of M7

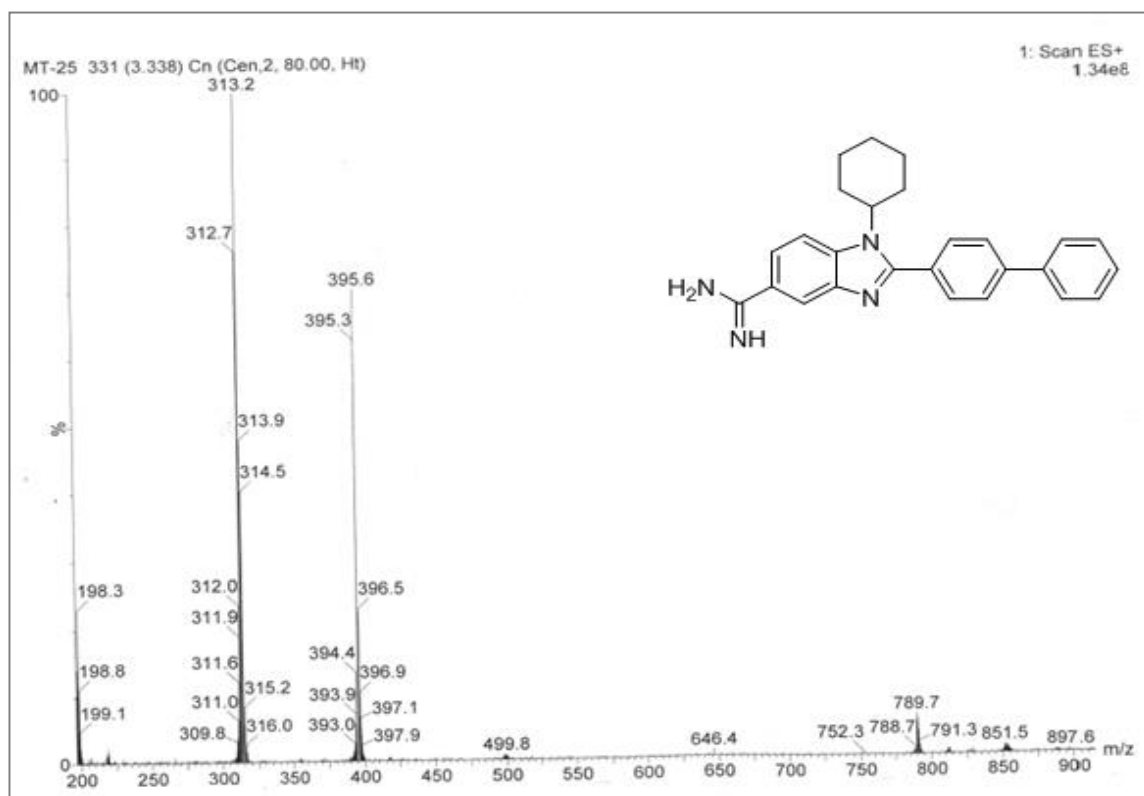

Figure 22. MASS spectra of M8

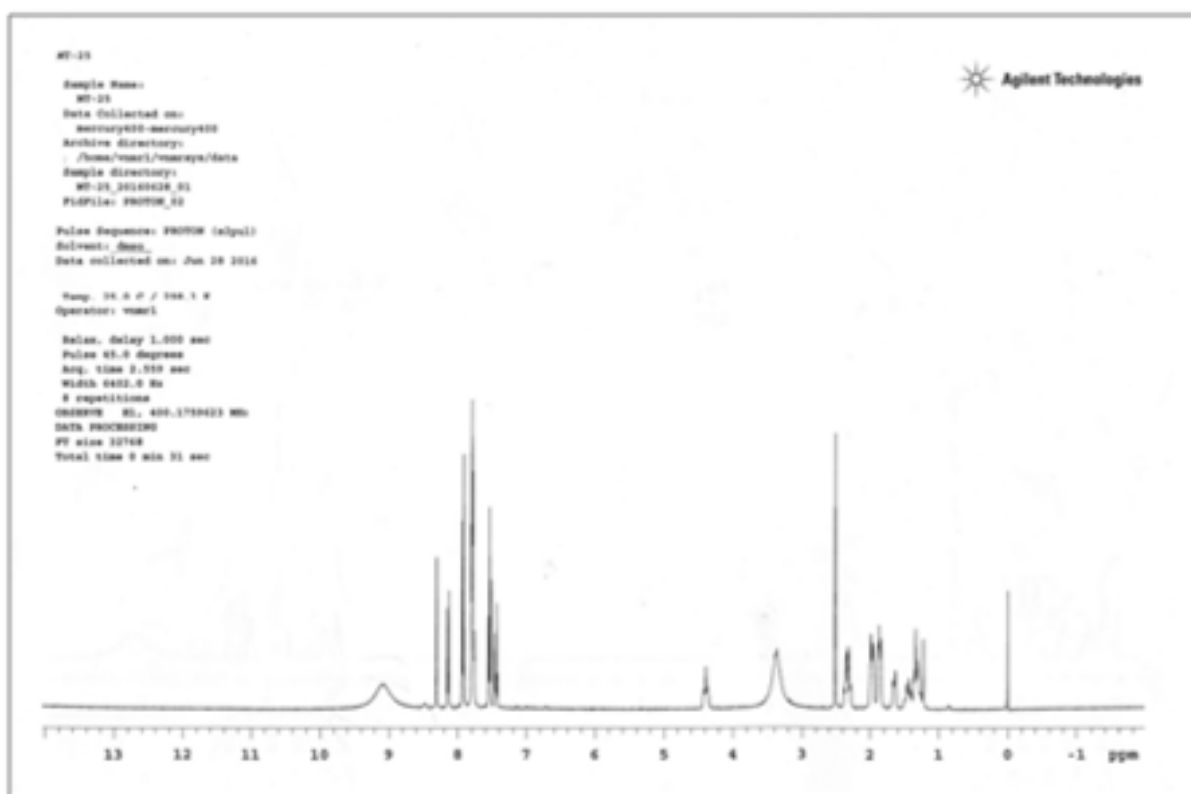

Figure 23. <sup>1</sup>H-NMR spectra of M8

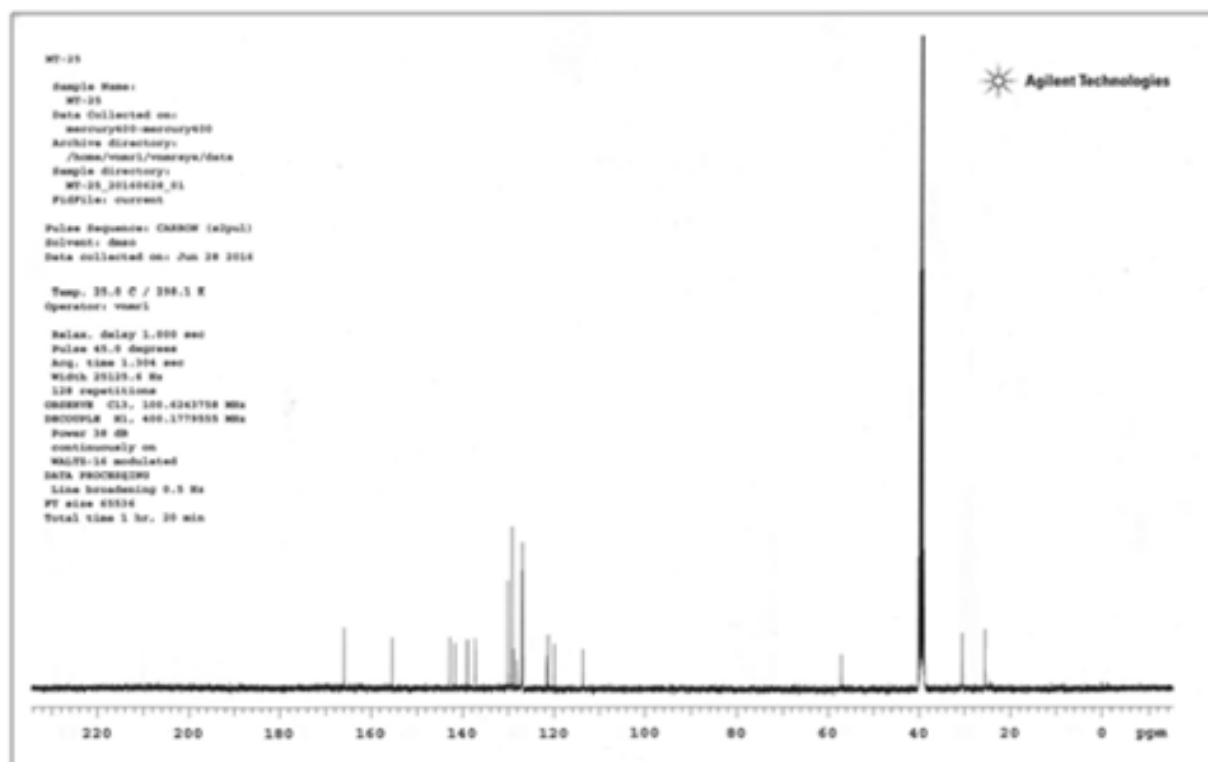

Figure 24. <sup>13</sup>C-NMR spectra of M8



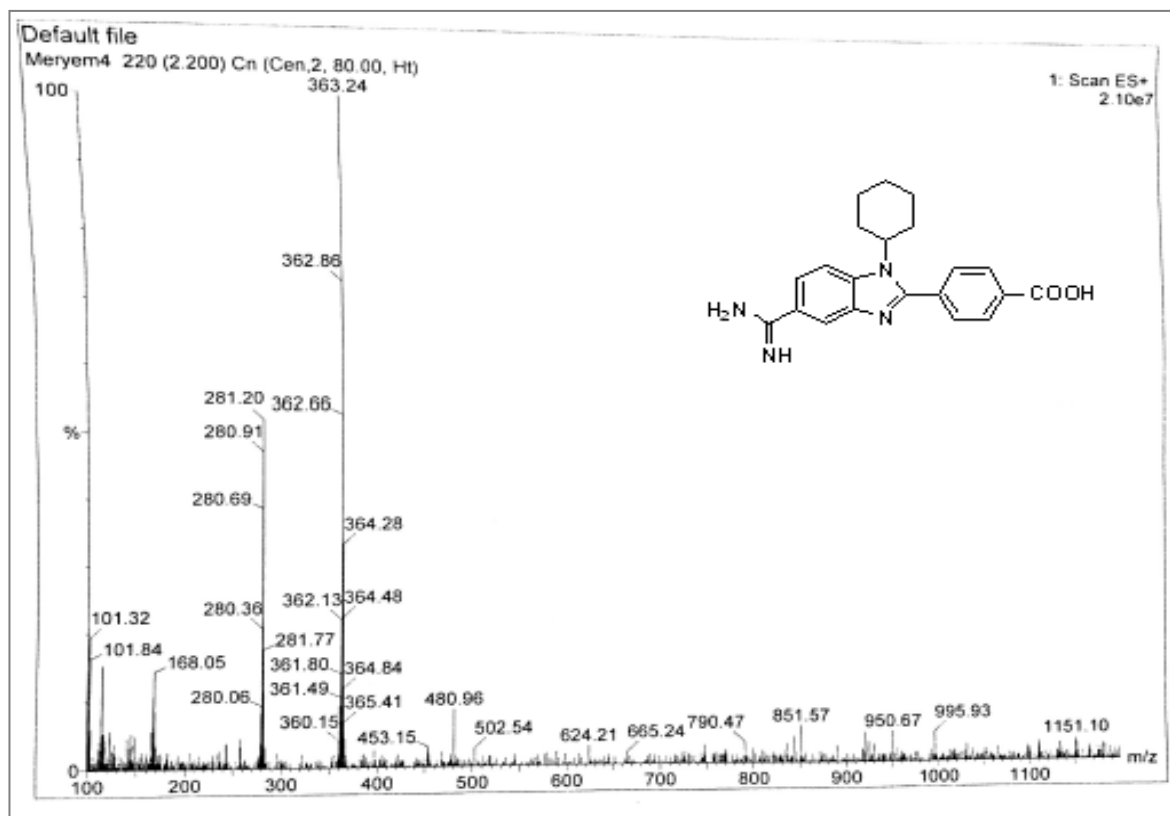

Figure 25. MASS spectra of M9

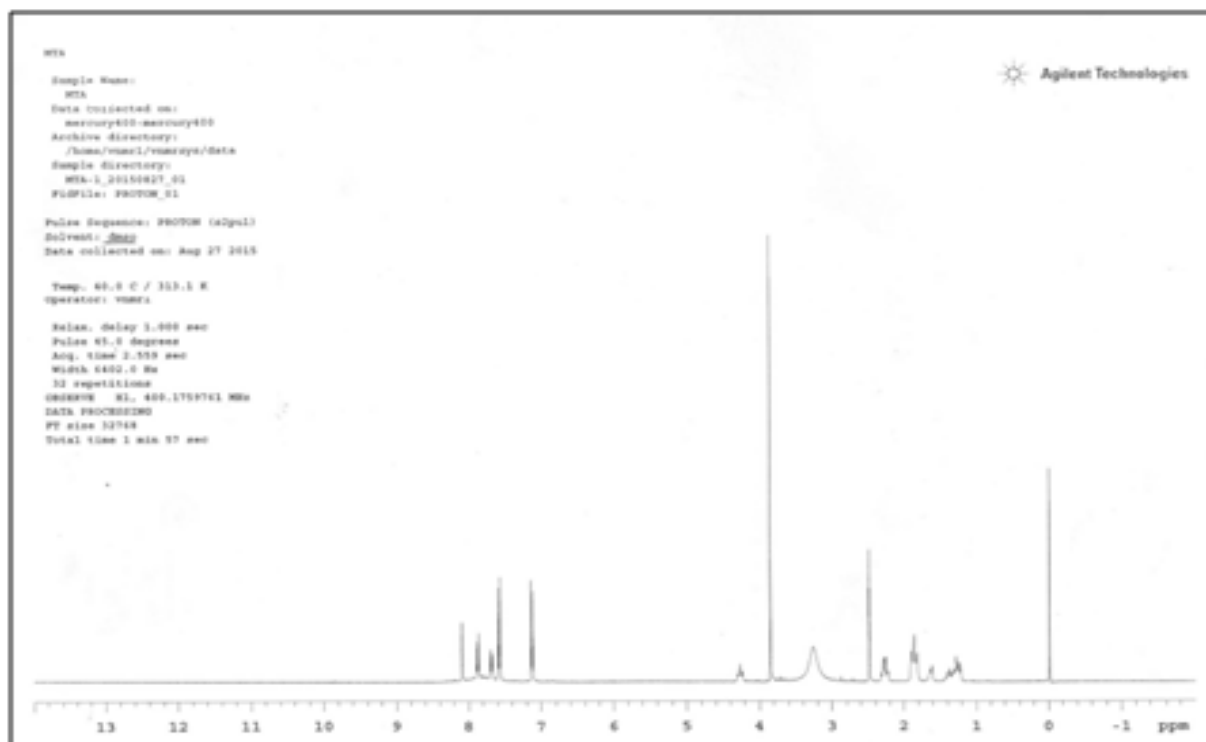

Figure 26.  $^1\text{H-NMR}$  spectra of M9



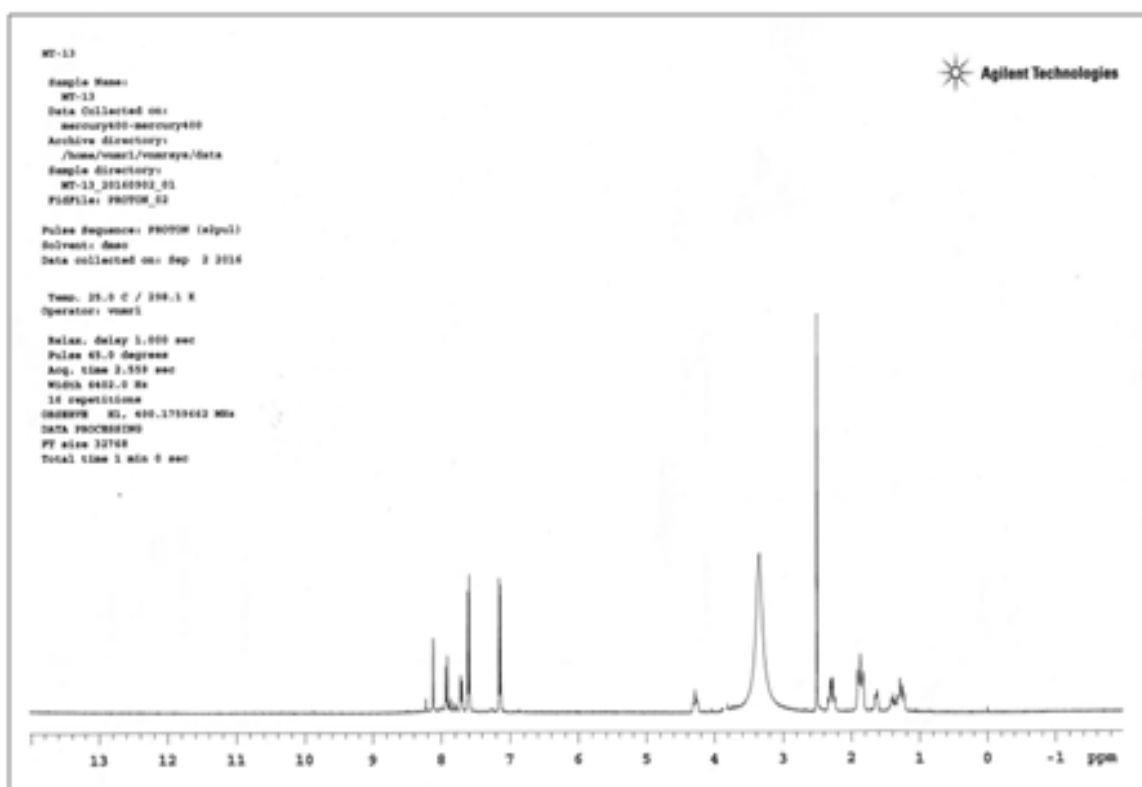

Figure 29. <sup>1</sup>H-NMR spectra of M10

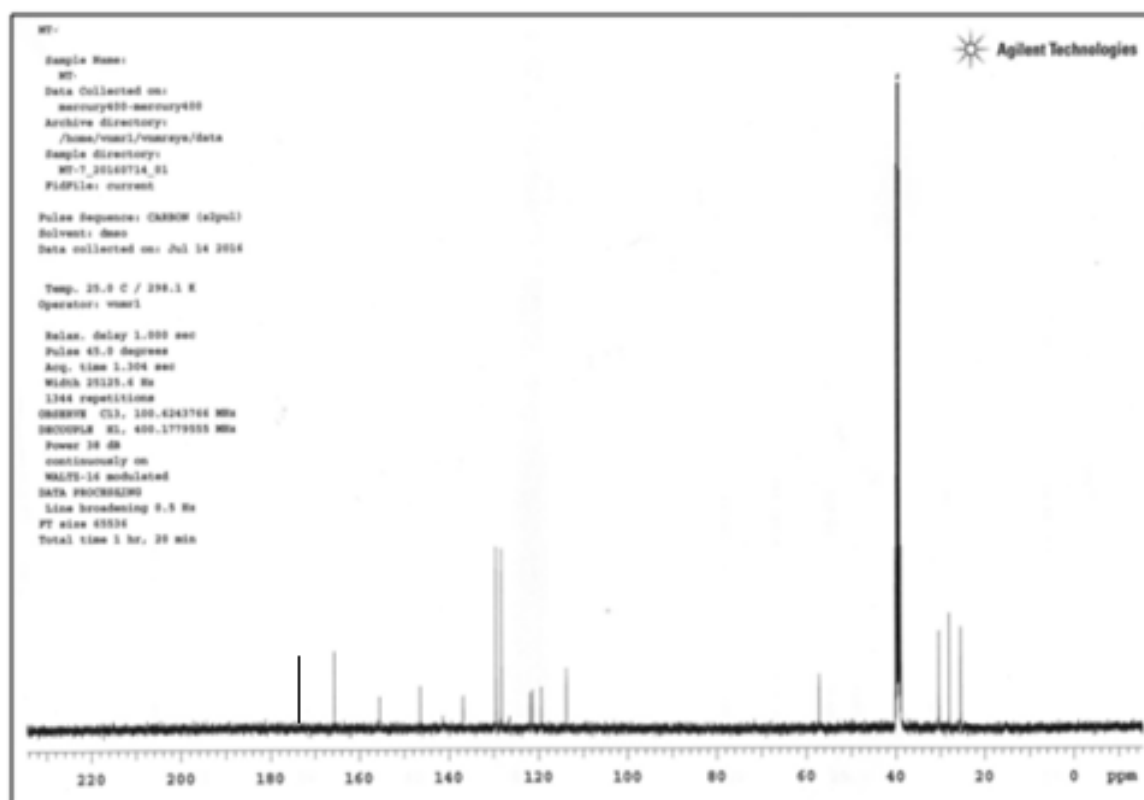

Figure 30. <sup>13</sup>C-NMR spectra of M10

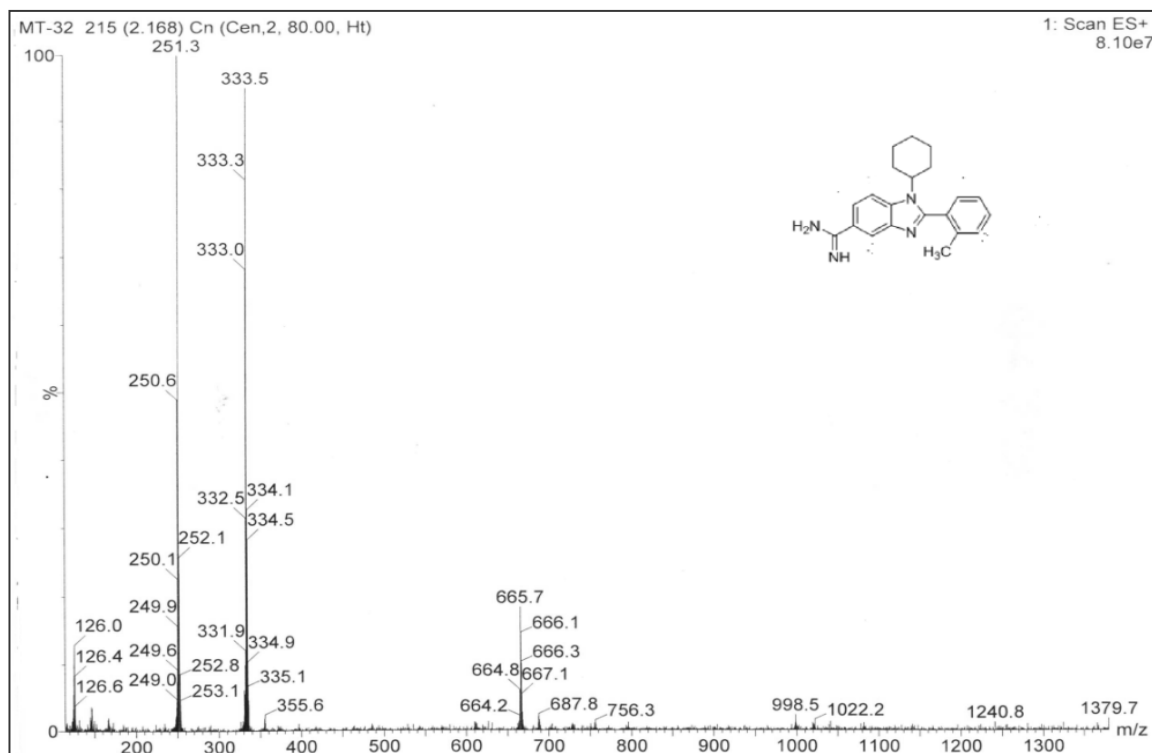

Figure 31. MASS spectra of M11

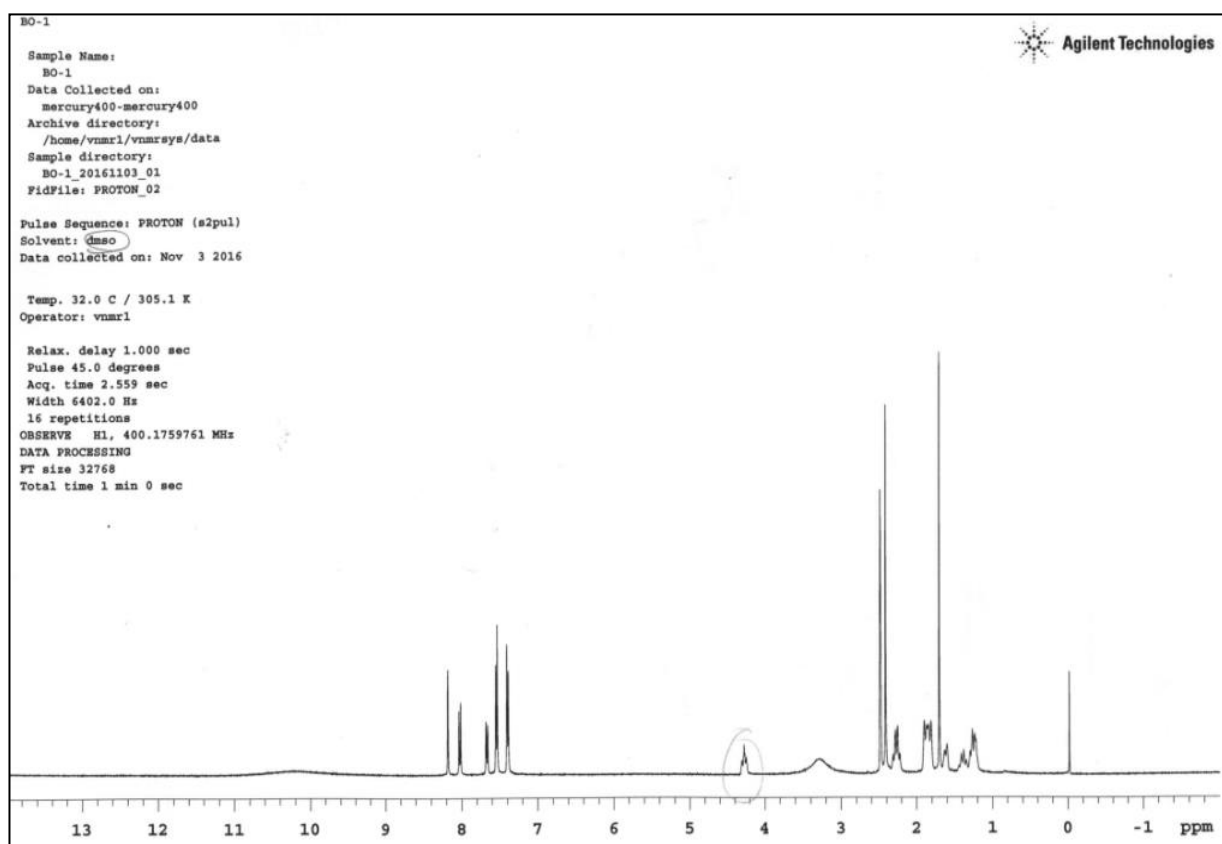

Figure 32. <sup>1</sup>H-NMR spectra of M11



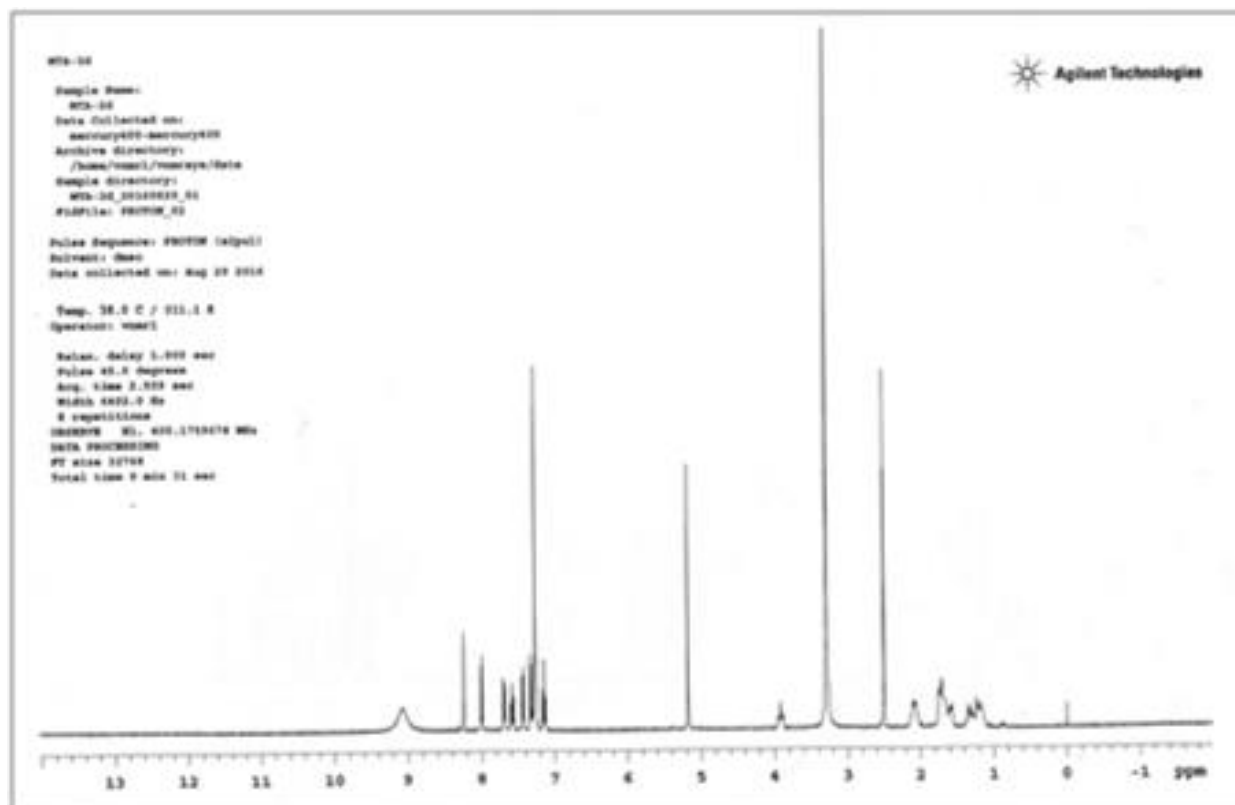

Figure 35.  $^1\text{H}$ -NMR spectra of M12

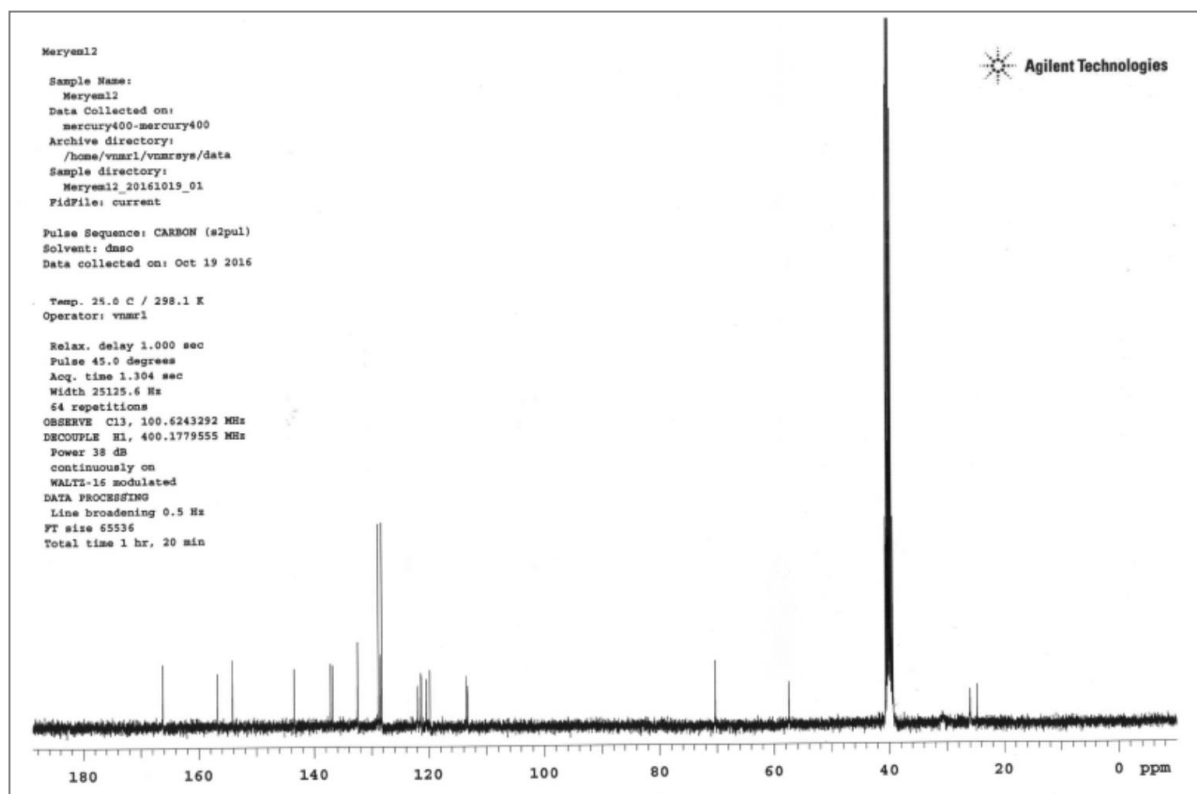

Figure 36.  $^{13}\text{C}$ -NMR spectra of M12

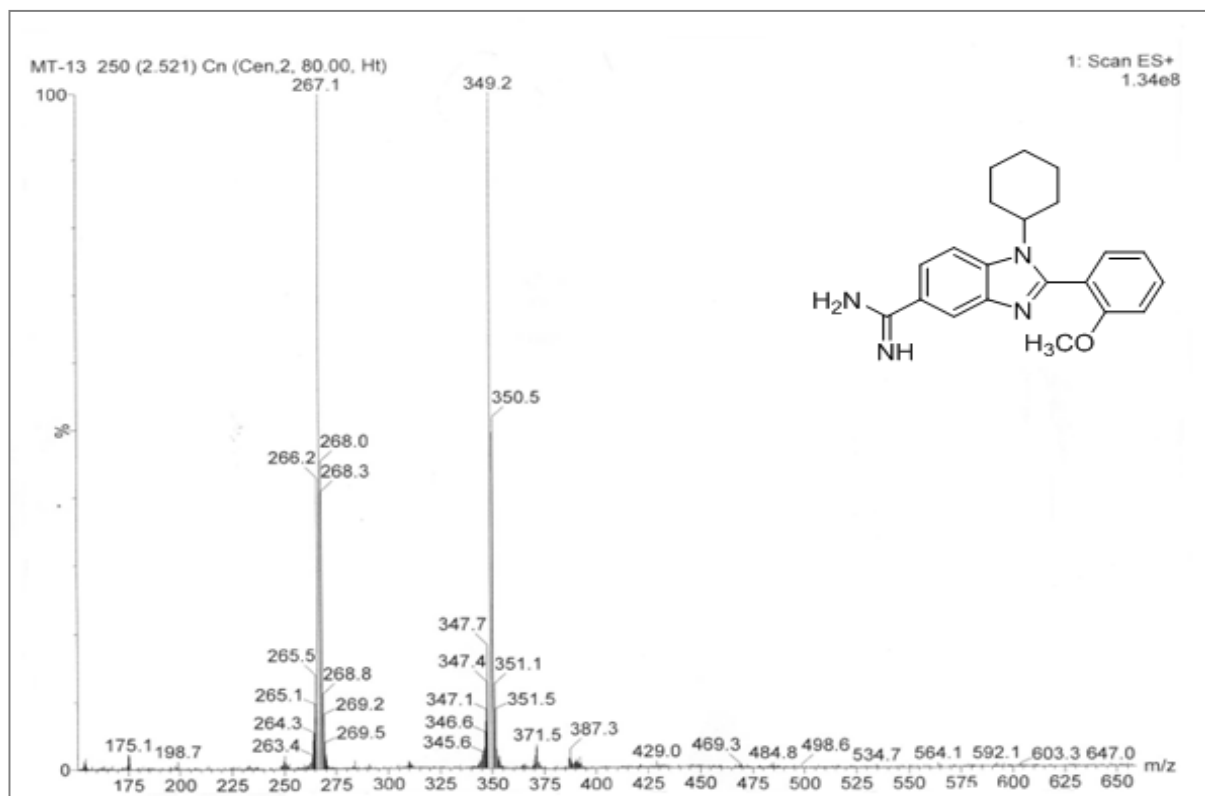

Figure 37. MASS spectra of M13

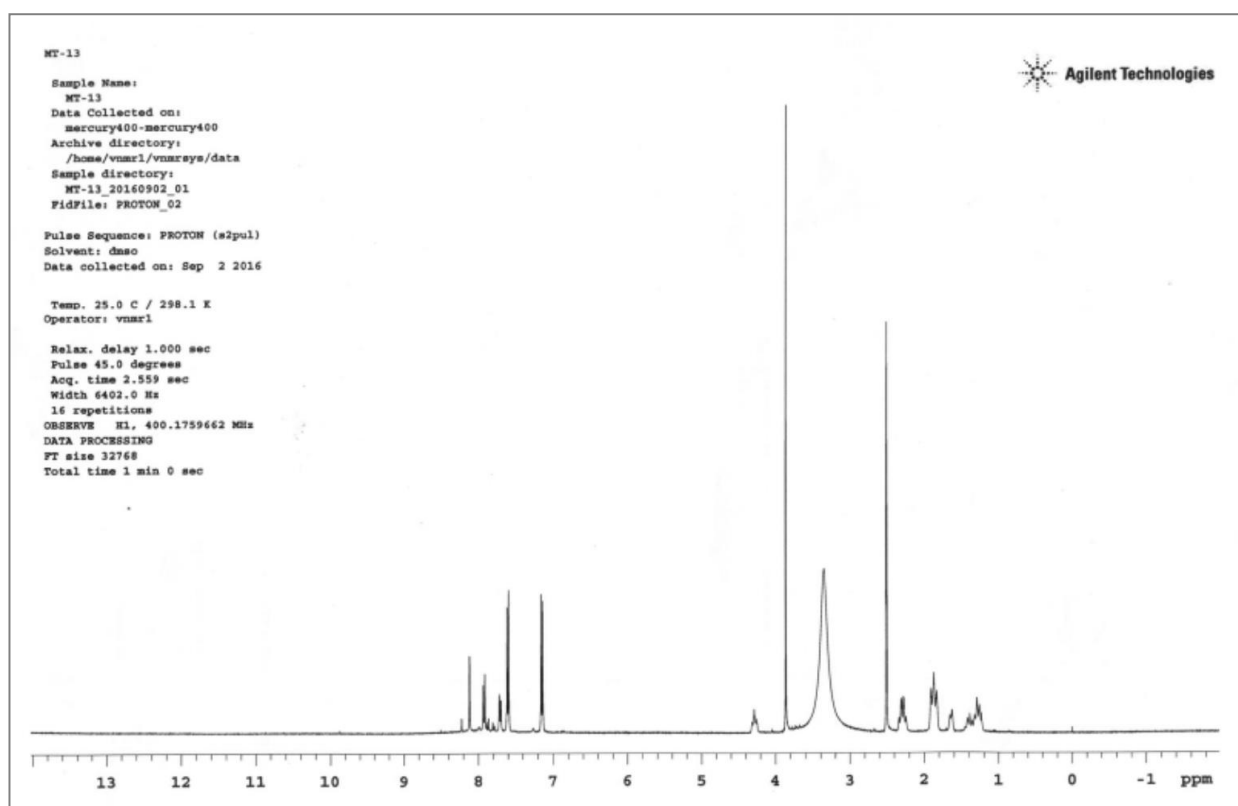

Figure 38. <sup>1</sup>H-NMR spectra of M13

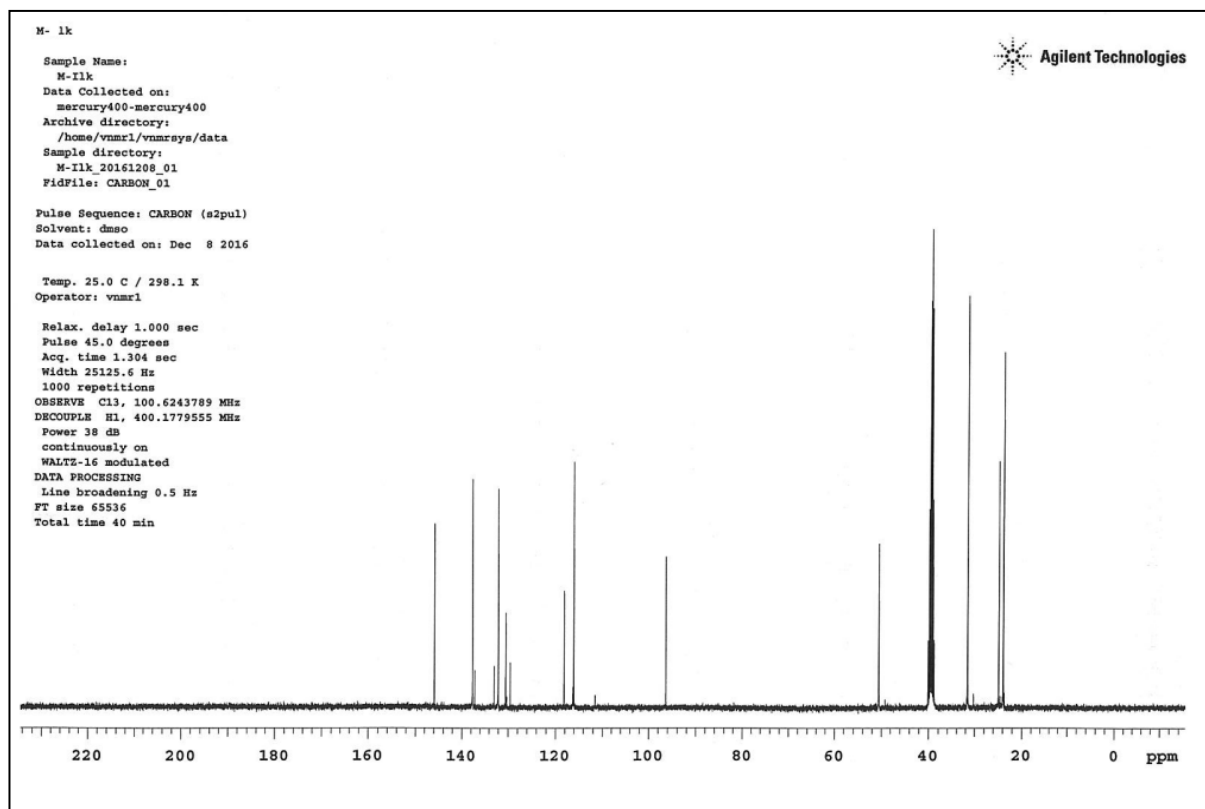

Figure 39.  $^{13}\text{C}$ -NMR spectra of M13

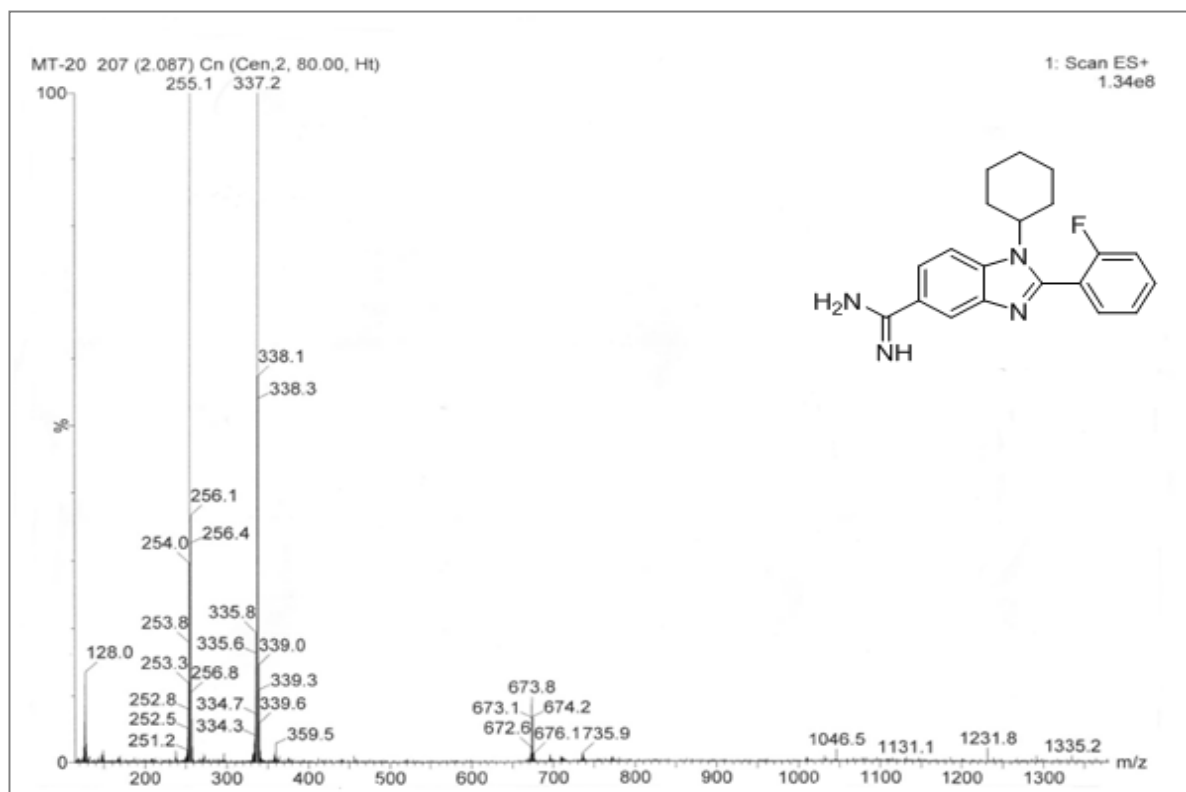

Figure 40. MASS spectra of M14



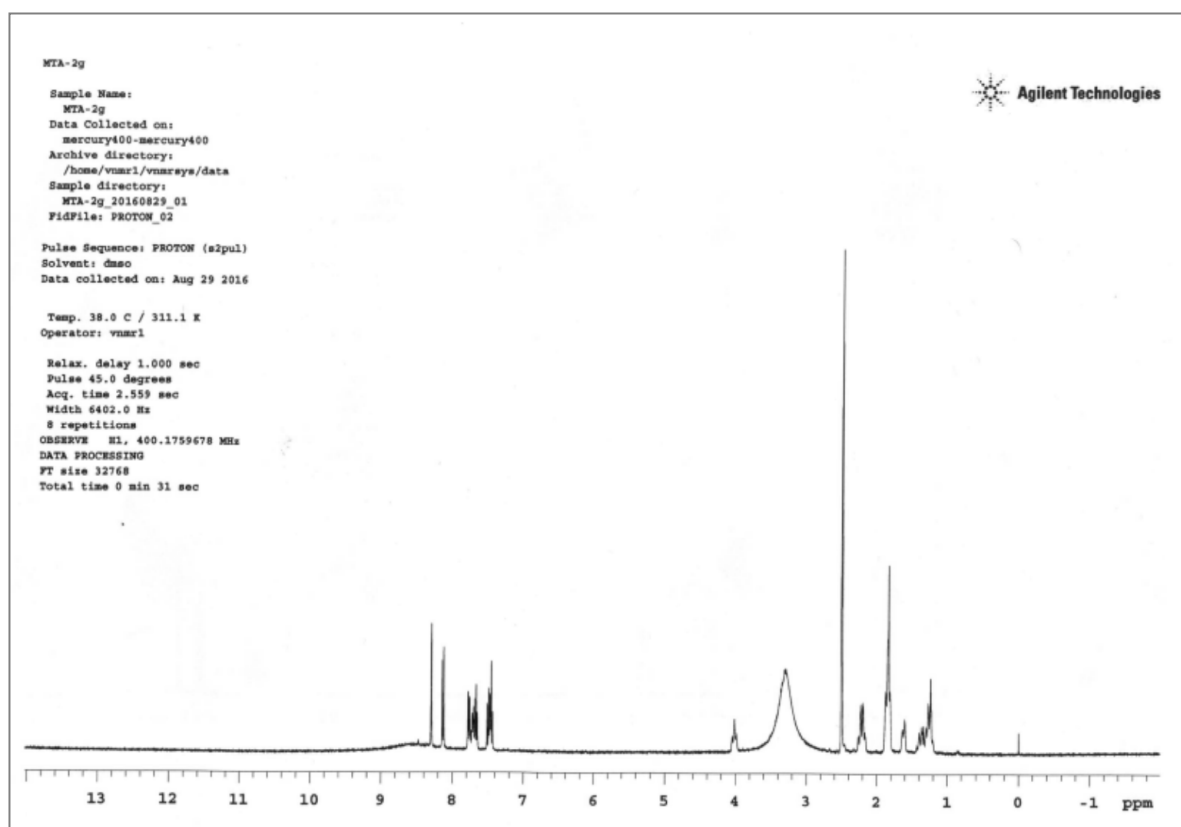

Figure 41.  $^1\text{H-NMR}$  spectra of M14

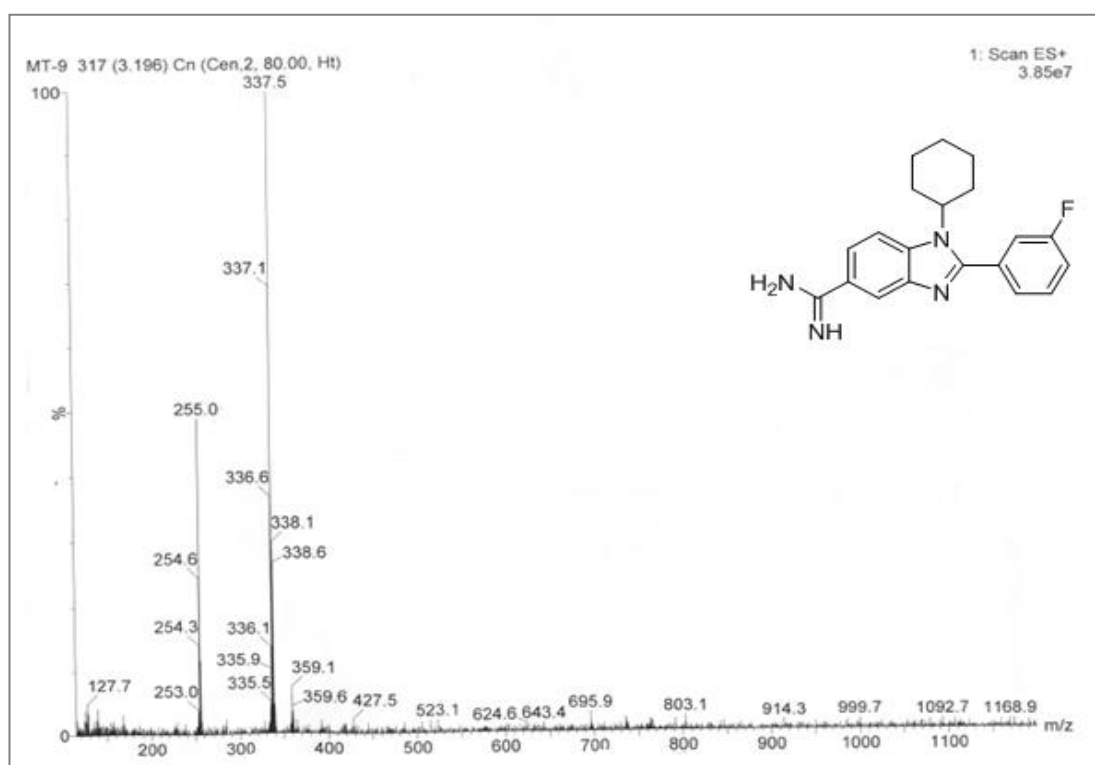

Figure 42. MASS spectra spectrum of M15

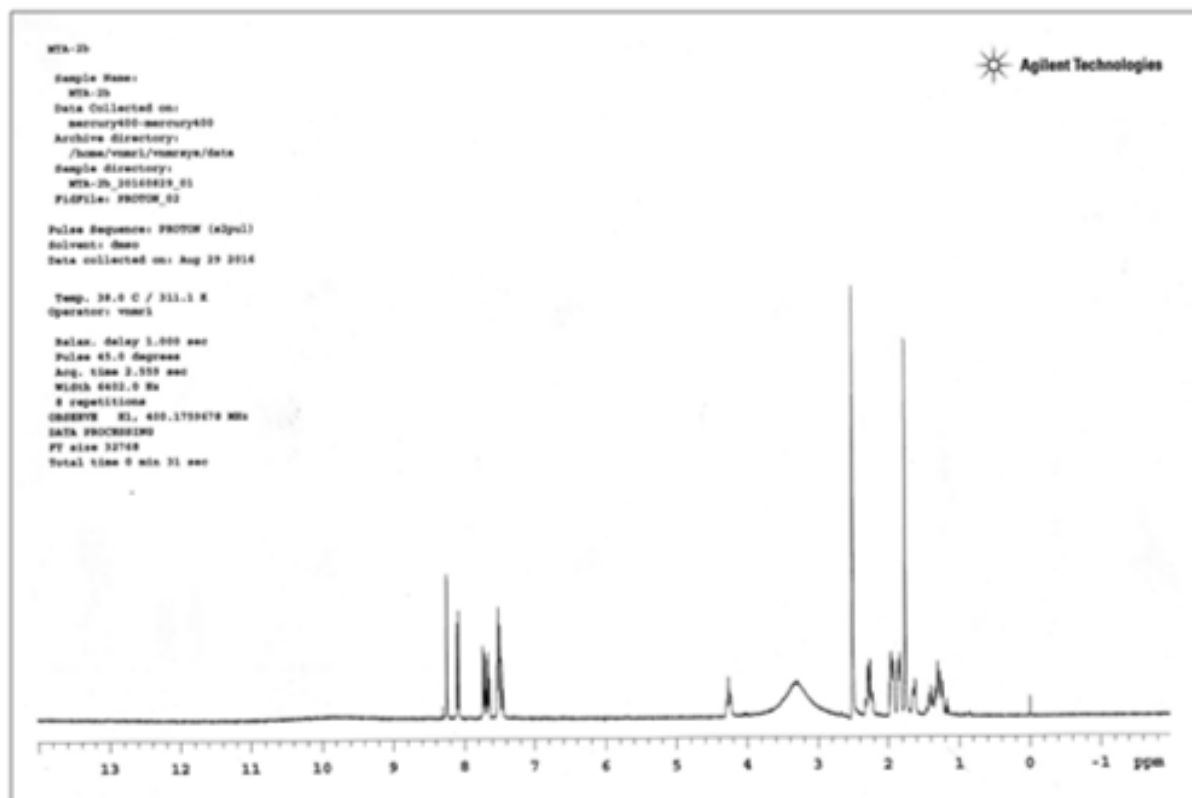

Figure 43.  $^1\text{H}$ -NMR spectra of M15

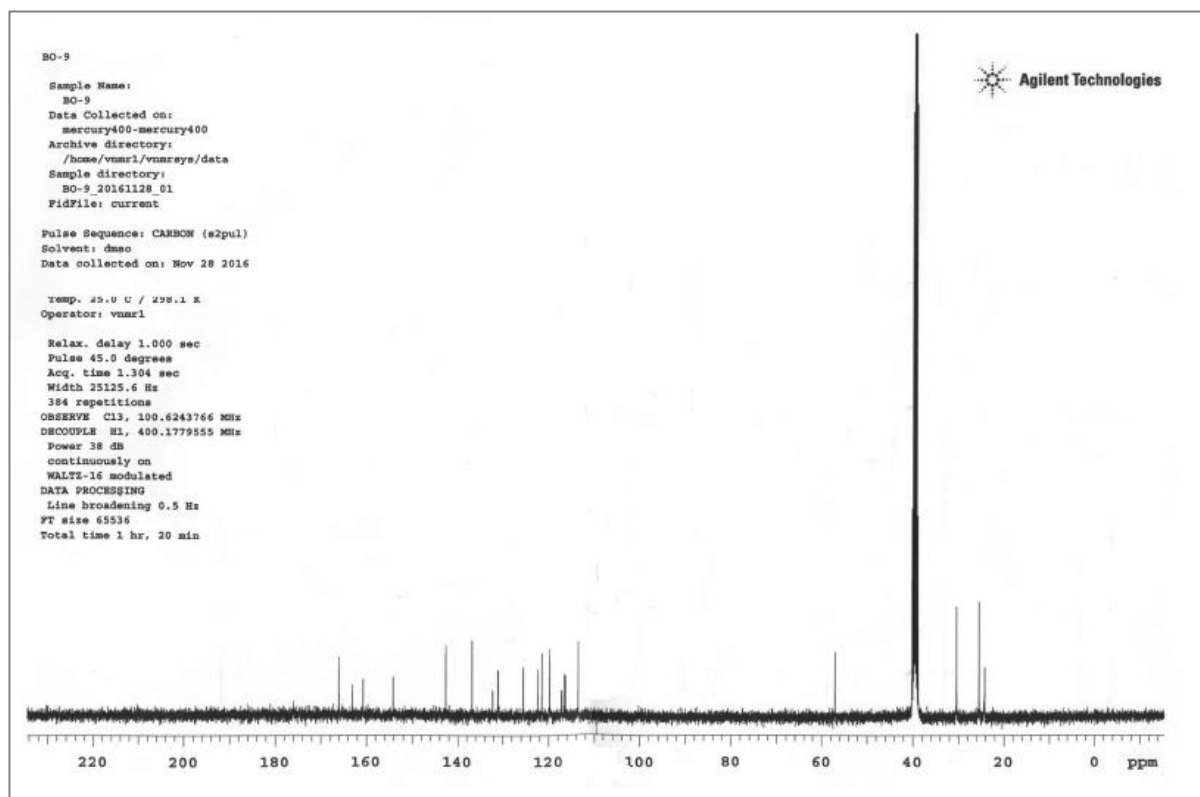

Figure 44.  $^{13}\text{C}$ -NMR spectra of M15

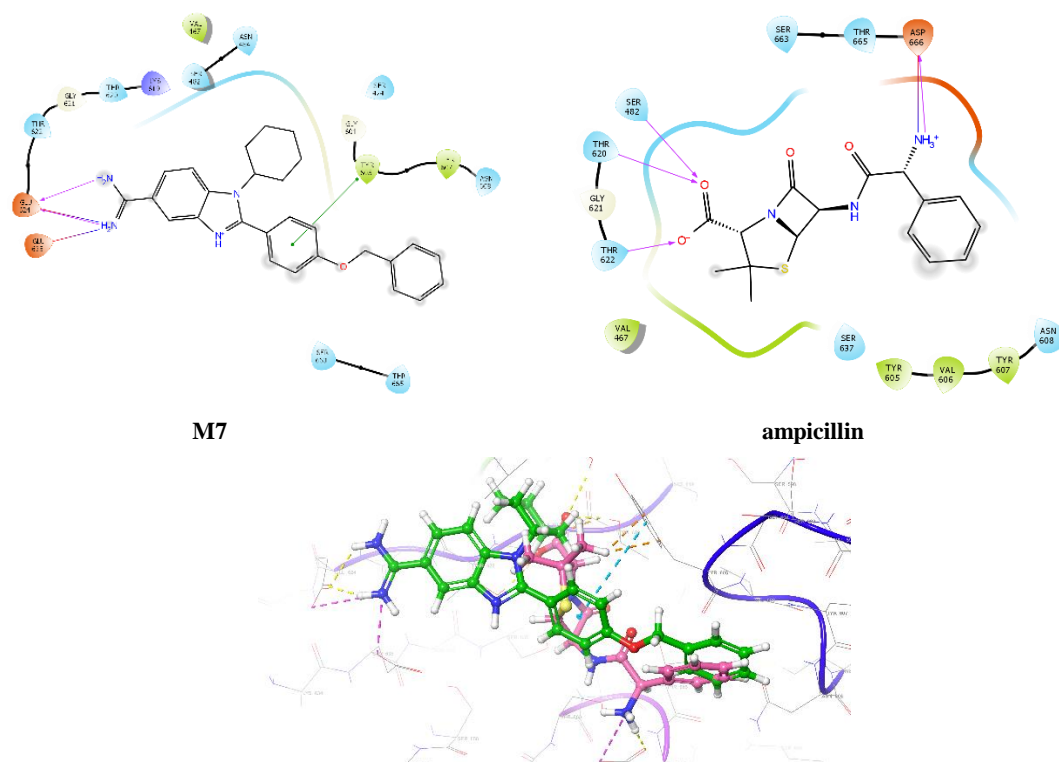

**Figure 45.** Ampicillin and **M7** interaction diagram on the PBP4 at the active site (PDB: 6MKI) (left) and binding poses of ampicillin (pink) and **M7** (green)
